# Supplementary material
Source: ML conference proceedings conference paper supplement (https://openreview.net/forum?id=FDruZlKWUb)
Supplement: supplementary_material [file _Neurips_2025__tracing_the_rep_geom_of_language_learning.pdf › _Neurips_2025__tracing_the_rep_geom_of_language_learning.pdf]

---

# Tracing the Representation Geometry of Language Models from Pretraining to Post-training

---

Melody Zixuan Li<sup>\*12</sup>

Kumar Krishna Agrawal<sup>\*3</sup>

Arna Ghosh<sup>\*1210</sup>

Komal Kumar Teru<sup>4</sup>

Adam Santoro<sup>†5</sup>

Guillaume Lajoie<sup>2610</sup>

Blake A. Richards<sup>1278910</sup>

## Abstract

Standard training metrics like loss fail to explain the emergence of complex capabilities in large language models. We take a spectral approach to investigate the geometry of learned representations across pretraining and post-training, measuring effective rank (RankMe) and eigenspectrum decay ( $\alpha$ ReQ). With OLMo (1B-7B) and Pythia (160M-12B) models, we uncover a consistent non-monotonic sequence of three geometric phases during autoregressive pretraining. The initial “warmup” phase exhibits rapid representational collapse. This is followed by an “entropy-seeking” phase, where the manifold’s dimensionality expands substantially, coinciding with peak n-gram memorization. Subsequently, a “compression-seeking” phase imposes anisotropic consolidation, selectively preserving variance along dominant eigendirections while contracting others, a transition marked with significant improvement in downstream task performance. We show these phases can emerge from a fundamental interplay of cross-entropy optimization under skewed token frequencies and representational bottlenecks ( $d \ll |\mathcal{V}|$ ). Post-training further transforms geometry: SFT and DPO drive “entropy-seeking” dynamics to integrate specific instructional or preferential data, improving in-distribution performance while degrading out-of-distribution robustness. Conversely, RLVR induces “compression-seeking”, enhancing reward alignment but reducing generation diversity.

## 1 Introduction

Loss curves during training offer an incomplete account of how large language models (LLMs) learn specific behaviors [Wei et al., 2022, Ganguli et al., 2022]. While training loss typically decreases monotonically [Kaplan et al., 2020, Hoffmann et al., 2022], model capabilities and internal representational structures exhibit significant qualitative shifts [Singh et al., 2023, Brown et al., 2023, Singh et al., 2024]. This disconnect highlights a fundamental challenge: How do high-dimensional distributed representations within LLMs evolve during training, and how do these representational transformations give rise to emergent capabilities?

We answer this question by using spectral analysis to quantify the geometric evolution of LLM representations. We discover that this evolution is not a smooth progression but a consistent, three-

---

<sup>\*</sup>Equal Contribution, <sup>†</sup> Advisory capacity only, Correspondence: blake.richards@mcgill.ca

<sup>1</sup>Computer Science, McGill University, Canada <sup>2</sup>Mila - Quebec AI Institute, Canada <sup>3</sup>UC Berkeley, USA

<sup>4</sup>Cohere, Canada <sup>5</sup>Google Deepmind, Canada <sup>6</sup>Mathematics and Statistics, Université de Montréal, Canada

<sup>7</sup>Neurology & Neurosurgery, McGill University, Canada <sup>8</sup>Montreal Neurological Institute, Canada

<sup>9</sup>CIFAR Learning in Machines & Brains Program, Canada <sup>10</sup>Google Paradigms of Intelligence, Canada

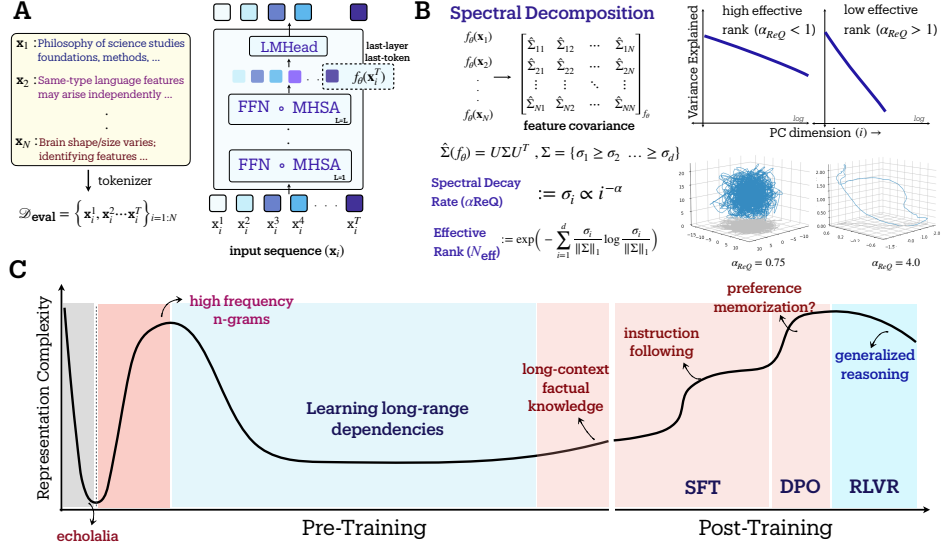

Figure 1: **Spectral framework reveals three universal phases in LLM training.** (A) LLM representations analyzed via empirical feature covariance  $\hat{\Sigma}(f_\theta)$  of last-token hidden states  $f_\theta(x_i)$ . (B) Two complementary spectral metrics:  $\alpha_{ReQ}$  measures eigenspectrum decay rate (variance concentration), while RankMe quantifies effective rank (utilized dimensionality). (C) Pretraining exhibits three phases: “warmup” (rapid collapse), “entropy-seeking” (2-3 $\times$  expansion coinciding with n-gram memorization), and “compression-seeking” (anisotropic consolidation enabling long-context understanding). Post-training continues these dynamics: SFT/DPO induce “entropy-seeking” while RLVR induces “compression-seeking”.

phase dynamic. Our method centers on the spectral properties of the covariance matrix of last-token representations, which capture rich information about the model’s internal representations, especially when using causal attention. To measure this geometric structure, we compute two metrics from the eigenspectrum of these matrices: the effective rank (“RankMe”), and the power-law decay rate (“ $\alpha_{ReQ}$ ”) of the eigenvalues [Garrido et al., 2023, Agrawal et al., 2022]. These spectral measures of representation geometry have been linked theoretically and experimentally to generalization in downstream tasks [Bartlett et al., 2020, Thilak et al., 2023]. Intuitively, representation geometry tells us about the model’s expressive capacity, utilization, and amount of data compression.

Our analysis shows that LLM pretraining unfolds through a consistent sequence of distinct geometric phases marked by non-monotonic evolution of spectral properties. These phases correlate with significant shifts in the model’s expressive power and information compression ability (c.f. Figure 1):

- An initial “warmup” phase, coinciding with learning rate ramp-up, where there is a rapid collapse of representations onto dominant data manifold directions.
- An “entropy-seeking” phase marked by manifold expansion in many directions, which correlates with an increase in n-gram distributional memorization.
- A “compression-seeking” phase with anisotropic consolidation along principal feature eigenvectors shows enhanced learning of long-range dependencies and robust generalization.

We further develop mechanistic insights from analytically tractable toy models, demonstrating that these geometric phase transitions are influenced by the interplay of cross-entropy optimization, information bottlenecks, and skewed data distributions.

Our investigation of post-training stages reveals analogous geometric shifts: Supervised fine-tuning (SFT) produces an “entropy-seeking”-like expansion with concomitant assimilation of specific instructions. Reinforcement Learning from Verifiable Rewards (RLVR) produces a “compression-seeking”-like contraction, which can consolidate reward-aligned behaviors at the cost of curtailing generative novelty and exploration. Together, our findings present a more granular view of LLM training, and offer practical implications for optimizing LLM training and adaptation pipelines based on desired downstream outcomes.

## 2 Methods

### 2.1 Spectral Analysis, Matrix Entropy, and Effective Rank

**Last token representations in autoregressive language models:** A rigorous understanding of LLM capabilities necessitates a precise characterization of the *geometry of their learned representations*. An autoregressive language model processes an input sequence of discrete tokens  $\mathbf{s} = (t_1, t_2, \dots, t_N)$ , transforming each token  $t_k$  through its  $l$  layers (conditioned on preceding tokens  $t_{<k}$ ) into a sequence of high-dimensional continuous vectors  $\mathbf{f}_\theta^{(l)}(t_k|t_{<k})$ . For autoregressive models, the representation of the final token ( $t_N$ ) at the last layer,  $\mathbf{y}_N := \mathbf{f}_\theta^{(L)}(t_N|t_{<N})$ , is particularly pivotal. Its significance stems from different factors: (i) it directly parameterizes the predictive distribution for the subsequent tokens  $P(t_{N+1}|t_1, \dots, t_N)$ ; (ii) it synthesizes information from the entire context  $t_{\leq N}$  to inform this prediction, meaning it inherently reflects the model’s capacity for contextual understanding; and (iii) is often used as input to task-specific layers in downstream applications.

**High-dimensional representation complexity metrics:** To quantitatively measure representation geometry, we perform spectral analysis of the feature covariance matrix. Given a set of  $M$  input sequences, we form a feature matrix  $\mathbf{F} \in \mathbb{R}^{M \times d}$ ; each row is a feature vector of the last token  $\mathbf{y}_N$  for each input. Assuming the features are centered, the empirical covariance matrix is  $\hat{\Sigma} := \frac{1}{M} \mathbf{F}^T \mathbf{F}$ . The eigenspectrum of  $\hat{\Sigma}$ , denoted by eigenvalues  $\{\sigma_i(\hat{\Sigma})\}_{i=1}^d$ , measures the concentration of information along the principal axes of variation. The distribution of  $\{\sigma_i\}_{i=1}^d$  provides a quantitative description of feature geometry: a sharp decay indicates information compressed in a lower-dimensional subspace (anisotropic geometry), while a slow decay indicates a high-dimensional subspace is utilized.

This spectral perspective motivates using *matrix entropy* to measure the uniformity of the eigenvalue distribution. If  $p_i = \sigma_i / (\sum_j \sigma_j)$  is the proportion of variance along the  $i$ -th principal axis, the Von Neumann *entropy-based effective rank* [Roy and Vetterli, 2007, Garrido et al., 2023] is defined as:

$$\text{RankMe} := \exp\left(S(\hat{\Sigma})\right) = \exp\left(-\sum_{i=1}^d p_i \ln p_i\right) \in (0, d]. \quad (1)$$

Low entropy indicates a skewed eigenvalue distribution, i.e. low-dimensional (anisotropic) representations, while high entropy implies a uniform spread, i.e. high-dimensional (isotropic) representations.

Our empirical studies also show that LLM activation matrices exhibit *heavy-tailed* eigenvalue spectra, i.e., a power law distribution where  $\sigma_i \propto i^{-\alpha \text{ReQ}}$ , where  $\alpha \text{ReQ} > 0$  [Ghosh et al., 2022]. Slower decay or smaller  $\alpha \text{ReQ}$  implies a more uniform spread of  $\sigma_i$ ’s (higher dimensional), and thus higher  $S(\hat{\Sigma})$  and RankMe. Conversely, faster decay or larger  $\alpha \text{ReQ}$  implies representations are compactly packed along fewer principal directions [Stringer et al., 2019, Agrawal et al., 2022], yielding lower entropy and smaller RankMe.  $\alpha \text{ReQ}$  and RankMe thus provide related metrics of representation geometry, though unlike RankMe,  $\alpha \text{ReQ}$  does not change with the model’s feature dimensionality,  $d$ .

### 2.2 Quantifying Distributional Memorization and Generalization via n-gram Alignment

To dissect how LLMs utilize their pretraining corpus  $\mathcal{D}$ , we differentiate *distributional memorization*, i.e. how aligned are LLM output probabilities with n-gram frequencies in  $\mathcal{D}$ , from *distributional generalization*, i.e. LLM capabilities beyond such statistics [Liu et al., 2024]. To quantify the alignment with n-gram statistics, we use the  $\infty$ -gram language model (LM) which uses the largest possible value of  $n$  for predicting the next token probability. Briefly, an  $\infty$ -gram LM can be viewed as a generalized version of an  $n$ -gram LM which starts with  $n = \infty$ , and then performs backoff till the  $n$ -gram count in  $\mathcal{D}$  is non-zero [Liu et al., 2024]. Consequently, the output probability of the  $\infty$ -gram LM for each token is dependent on its longest existing prefix in  $\mathcal{D}$ .

The distributional memorization metric is defined as the spearman rank correlation ( $\rho_s$ ) between the  $\infty$ -gram LM outputs and the LLM outputs for all tokens in a target sequence [Wang et al., 2025]. Formally, consider a concatenated sequence of instructions,  $u$ , question,  $x$  and target,  $y$ , from a question-answering task,  $\mathcal{T}$ . Then, the distributional memorization is computed as:

$$\text{Mem}_\infty(\text{LLM}, \mathcal{D}, \mathcal{T}) := \rho_s(\bar{P}_{\infty, \mathcal{D}}(y|u \oplus x), \bar{P}_{\text{LLM}}(y|u \oplus x)) \quad (2)$$

where  $\bar{P}(y|u \oplus x) := \prod_{t_i \in y} P(t_i|u \oplus x \oplus y_{[t_0:t_{i-1}]})$  denotes the joint likelihood of all tokens in  $y$  and  $P(\cdot)$  is the next token prediction distribution, as described above.

## 2.3 Post-Training Methodologies and Evaluation

**Supervised Fine-Tuning (SFT)** adapts pre-trained LLMs by further training on a curated dataset  $\mathcal{D}_{\text{SFT}} = \{(x_i, y_i)\}_{i=1}^{N_{\text{SFT}}}$  typically consisting of instruction-response pairs. The standard objective is to minimize the negative log-likelihood of the target responses, effectively maximizing  $P_\theta(y|x)$  for examples in  $\mathcal{D}_{\text{SFT}}$ . We evaluate the robustness of the SFT model by contrasting its performance on held-out examples from  $\mathcal{D}_{\text{SFT}}$  (In-Distribution, ID) with its performance on examples from a related but distinct dataset  $\mathcal{D}_{\text{OOD}}$  (Out-of-Distribution, OOD), which may vary in task, style, or complexity not present in  $\mathcal{D}_{\text{SFT}}$  [Springer et al., 2025].

**Preference Alignment and Reasoning** : For alignment beyond SFT, we consider Direct Preference Optimization (DPO) [Rafailov et al., 2023] and Reinforcement Learning from Verifiable Rewards (RLVR). DPO refines an LLM policy  $\pi_\theta$  based on a static dataset of human preferences  $\mathcal{D}_{\text{pref}} = \{(x, y_w, y_l)\}$ , where the response  $y_w$  is preferred over  $y_l$  for prompt  $x$ . It directly optimizes for preference satisfaction by minimizing the loss:

$$\mathcal{L}_{\text{DPO}}(\pi_\theta; \pi_{\text{ref}}) = -\mathbb{E}_{(x, y_w, y_l) \sim \mathcal{D}_{\text{pref}}} [\log \sigma(\hat{r}_\theta(x, y_w) - \hat{r}_\theta(x, y_l))], \quad (3)$$

where  $\hat{r}_\theta(x, y) = \beta \log(\pi_\theta(y|x)/\pi_{\text{ref}}(y|x))$  represents the implicit log-ratio of probabilities scaled by  $\beta$  against a reference policy  $\pi_{\text{ref}}$ , and  $\sigma(\cdot)$  is the logistic function. Reinforcement Learning from Verifiable Rewards (RLVR), as applied in works like Lambert et al. [2024] and Shao et al. [2024], optimizes the LLM’s policy  $\pi_\theta$  to maximize the expected discounted cumulative reward,  $J(\theta) = \mathbb{E}_{\tau \sim \pi_\theta} \left[ \sum_{t=0}^T \gamma^t R_t \right]$ , where  $\tau = (s_0, a_0, \dots, s_T, a_T)$  is a trajectory generated by actions  $a_t \sim \pi_\theta(\cdot|s_t)$  in states  $s_t$ ,  $\gamma \in [0, 1]$  is a discount factor, and  $R_t = R(s_t, a_t)$  is the reward at time  $t$ . This optimization is typically performed using policy gradient algorithms (e.g., PPO). Critically, the reward  $R_t$  in RLVR is derived from verifiable properties of the LLM’s outputs, e.g. correctness on mathematical problems or passing unit tests.

**Performance with pass@k**: To evaluate problem-solving efficacy and generative exploration, particularly for RLVR-tuned models, we employ the pass@k metric [Kulal et al., 2019]. For a given problem, k independent responses are stochastically generated from the model; the problem is deemed solved if at least one response constitutes a verifiable solution. Since direct estimation of pass@k can exhibit high variance, we utilize the unbiased estimator Chen et al. [2021], Yue et al. [2025]:

$$\text{pass@k} = \mathbb{E}_{P_i} \left[ 1 - \frac{\binom{N-c_i}{k}}{\binom{N}{k}} \right] \quad (4)$$

where, N samples are generated for each problem  $P_i$ , and  $c_i$  denotes the count of correct solutions among them (parameters for this work are N=512 and k ≤ 256).

## 3 Probing the representation geometry of language models

To study LLM representation geometry at intermediate stages of the training lifecycle, we analyze checkpoints from three publicly released model suites. For all experiments, we used 15000 sequences from the the FineWeb sample-10BT dataset to probe the geometry of model representations. We defer additional details on the model architecture, dataset and training run to Appendix A.

- **OLMo framework** Groeneveld et al. [2024], OLMo et al. [2024], Lambert et al. [2024]: Developed by AI2, OLMo & OLMo-2 family of models provide intermediate checkpoints across different model sizes – 1B, 7B and 13B. We focused on intermediate checkpoints available for the OLMo-2 7B and 1B models throughout their  $\sim 4T$  token training run.
- **Pythia suite** Biderman et al. [2023]: Developed by EleutherAI, this suite consists of models ranging from 70M to 12B parameters, all trained on the Pile dataset [Gao et al., 2020] using the same data ordering and hyperparameters across scales. We analyzed the intermediate checkpoints available at various intermediate training steps for 1B+ models.
- **Tülu-3.1 models** [Wang et al., 2024]: Developed by AI2, this suite contains instruction following 8B LLaMA-based models parameters, that were post-trained with state-of-the-art recipes. We analyzed checkpoints from all post-training stages of the model.

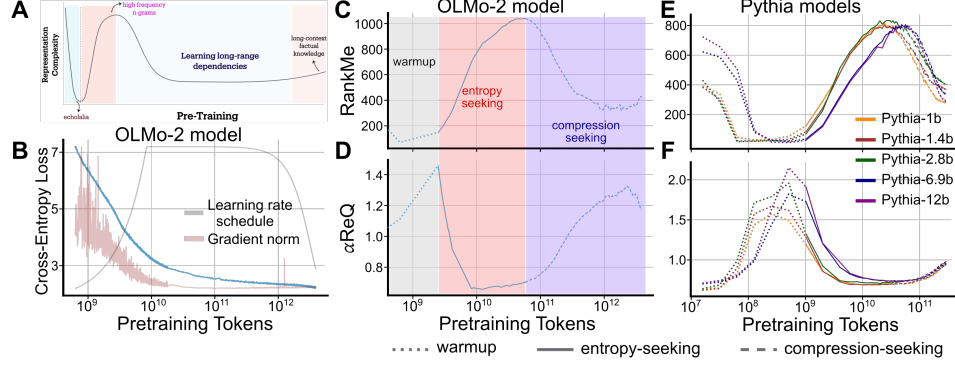

Figure 2: **Loss decreases monotonically, but representation geometry does not.** (A) Schematic from Fig 1, for the pretraining stage. (B) Cross-entropy loss, gradient norm and learning rate schedule during OLMo-2 7B model pretraining. (C, D) RankMe and  $\alpha$ ReQ, respectively, for OLMo-2 7B model vary non-monotonically across pretraining, demonstrating three key phases: “warmup”, “entropy-seeking”, and “compression-seeking”. (E, F) Same as C,D, but for Pythia models, demonstrating the consistent existence of the three phases across model families and scales.

### 3.1 Phases of pretraining: Non-monotonic changes in representation geometry

During the LLM pretraining stage, standard metrics used for identifying optimization instabilities, e.g. loss or gradient norms, often decrease near-monotonically. While useful to practitioners while determining successful recipes for pretraining large models, these metrics carry limited information about the model capabilities and downstream behavior. We demonstrate, on the contrary, that the high-dimensional representation geometry metrics undergo non-monotonic changes. (And, later we demonstrate that these changes correlate with downstream performance).

Figure 2 illustrates this contrasting trend between the optimization metrics and representation geometry metrics during the pretraining of aforementioned family of LLMs. Specifically, we measured the RankMe [Garrido et al., 2023] and  $\alpha$ ReQ [Agrawal et al., 2022] metrics on the LLM’s last layer representation of the last token while processing sequences from the FineWeb dataset [Penedo et al., 2024], and observed that there exist three distinct phases during the pretraining stage. Initially, there is a “warmup” phase, coinciding with the learning rate ramp-up, exhibiting a rapid collapse of the representations along the dominant data manifold directions. This relatively short phase is followed by an “entropy-seeking” phase characterized by a manifold expansion in several directions, and then a “compression-seeking” phase that imposes an anisotropic consolidation of the representation space along its principal eigenvectors. We observe these phases in both OLMo2 and Pythia family of models across different model sizes, indicating the consistent nature of non-monotonic changes in representation geometry during pretraining. It is worth noting that there could be emergence of additional “entropy-seeking” and “compression-seeking” with more pretraining, as in later stages of OLMo-2 7B model pretraining (c.f. Figure 2C). Notably, these phases persist even in smaller models below 1B parameters (Appendix Fig. 11), demonstrating the fundamental nature of this geometric evolution. Furthermore, these three-phase dynamics are consistently observed across intermediate layers throughout the network depth (Appendix Figure 7), confirming that the geometric evolution is not confined to just the final layer representations.

**Key takeaway.** Despite near-monotonic loss, representation geometry exhibits a consistent, non-monotonic phase sequence (“warmup” ; “entropy-seeking” ; “compression-seeking” ). These trends are stable across: (i) sample count  $M$  and sequence length  $L$ ; (ii) dataset choice within family; and (iii) layers (with last-layer sufficing for tracking), for both OLMo and Pythia.

### 3.2 Memorization & beyond: Distributional memorization happens in entropy-seeking phase

In this section, we seek to associate the different geometric phases to specific LLM behaviors. Downstream tasks that test the LLM’s factual reasoning and language understanding abilities seem to improve with more pretraining. However, it is unclear to what extent this increase is due to an improvement in the model’s memorization ability, i.e. how good is the model in “regurgitating” short-context phrases from the pretraining dataset, as opposed to a general language understanding,

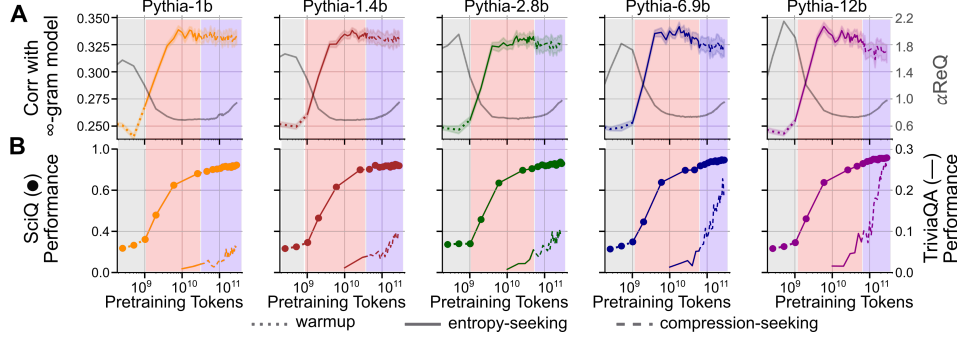

Figure 3: **Distinct learning phases are linked to different LLM capabilities.** (A) Memorization metric, i.e. spearman correlation between LLM and  $\infty$ -gram outputs, and representation geometry metric,  $\alpha$ ReQ, across Pythia models’ (1–12B parameters) pretraining. Memorization peaks late in the “entropy-seeking” phase before plateauing or degrading slightly in the “compression-seeking” phase, suggesting that the former prioritizes capturing short-context n-gram statistics. (B) 0-shot performance on multiple-choice (SciQ) and factual question-answering (TriviaQA) tasks across pretraining. While accuracy on SciQ benefits from learning in both phases, accuracy on TriviaQA *groks* once the model learns long-context statistics, primarily in the “compression-seeking” phase.

i.e. leveraging long-context dependencies to generate reasonable output. We disentangle these two factors by using the distributional memorization metric Wang et al. [2025] presented in eq. (2) for Pythia models when processing sequences from the TriviaQA dataset [Joshi et al., 2017]. Notably, the  $\infty$ -gram model predominantly utilizes short- to medium-length suffixes (Appendix Table 7), making it an ideal baseline for measuring short-context memorization capabilities.

Figure 3 illustrates the memorization metric and task performance over the course of pretraining for Pythia models of 5 different sizes – ranging from 1B to 12B. Across all models, the distributional memorization metric increased during the “entropy-seeking” phase and peaked towards the end of this phase. Intuitively, this result suggests that the “entropy-seeking” phase is particularly important for learning short-context statistics, e.g. high-frequency n-grams, present in the pretraining corpus. This intuition is also supported by Wang et al. [2025] (c.f. Fig 12). Following this peak in the memorization metric, it plateaued (or slightly decreased) during the “compression-seeking” phase, suggesting that the model’s output in this phase is guided by factors beyond n-gram statistics. Notably, the 0-shot accuracy on multiple-choice question-answering tasks, e.g. SciQ [Welbl et al., 2017], consistently improved throughout both the “entropy-seeking” and “compression-seeking” phases, potentially benefiting from both short- and long-context information learned in the respective phases.

However, 0-shot performance on factual question-answering tasks, e.g. TriviaQA [Joshi et al., 2017], demonstrate a sudden and dramatic rise in accuracy closely aligned with the saturation of the memorization metric. Consequently, most of the improvement in task accuracy happens during the “compression-seeking” phase, potentially benefiting from the long-context statistics learned in this phase, which are crucial for this task. The requirement of long-context dependencies for TriviaQA (and not SciQ) [Lou et al., 2024] seems to be – at least in part – responsible for the distinct performance on these tasks in the “entropy-seeking” and “compression-seeking” phases. Taken together, these findings outline a distinct association between each phase and the emergence of different LLM capabilities: short-context n-gram modeling during the “entropy-seeking” phase and long-context information aggregation during the “compression-seeking” phase.

**Key takeaway.** “entropy-seeking” expands utilized dimensions (RankMe  $\uparrow$ ,  $\alpha$ ReQ  $\downarrow$ ), aligning with increased alignment to  $\infty$ -gram statistics (short-context distributional memorization). In contrast, “compression-seeking” anisotropically concentrates information (RankMe  $\downarrow$ ,  $\alpha$ ReQ  $\uparrow$ ), aligning with improvement in long-context QA accuracy even as memorization saturates.

### 3.3 Role of learning objective and optimization in learning dynamics

Having demonstrated the existence and salience of distinct learning phases, we now seek to understand the role of loss and optimization frameworks used in LLM pretraining in engendering these phases. Specifically, we studied the gradient descent dynamics while optimizing the cross-entropy loss in



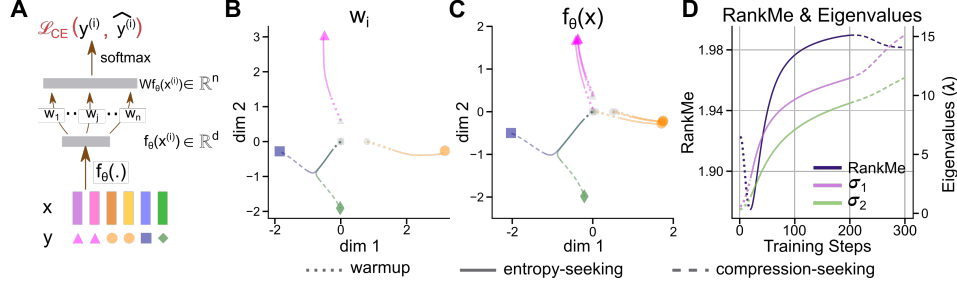

**Figure 4: Learning dynamics of cross-entropy loss replicate multiphase learning dynamics.** (A) Schematic of a model with feature extractor  $f_\theta(\in \mathbb{R}^d)$ , linear classifier  $W(\in \mathbb{R}^{n \times d})$  and cross-entropy loss  $\mathcal{L}_{CE}$ . Skewed class distribution and information bottleneck ( $d < n$ ) are critical to replicate all three phases observed in LLM pretraining. (B, C) Classifier weights ( $W_i$ ) and feature representations ( $f_\theta(x)$ ) demonstrate distinctive trajectories analogous to “warmup” (dotted), “entropy-seeking” (solid), and “compression-seeking” (dashed) phases. (D) Quantitative spectral metrics RankMe and eigenvalues,  $\sigma_1, \sigma_2$ .

an analytically-tractable setting — the model  $f_\theta(x)$  is linear, i.e.  $f_\theta(x) = \theta x \in \mathbb{R}^d$ , and logits are obtained (like in LLM models) as  $z = Wf_\theta(x) = W\theta x \in \mathbb{R}^{|\mathcal{V}|}$ . The outputs are obtained by applying a softmax operation on  $z$  (see Figure 4A). We extended the results of Pezeshki et al. [2021] to study how  $W$  and  $f_\theta(\cdot)$  change when optimizing the loss using gradient descent. Notably, we found two key properties of gradient descent that contribute to the emergent geometric properties of the representation space (see Appendix B for formal statements):

- **Primacy bias:** Representations and weights corresponding to high-frequency tokens are learned earlier in training, compared to low-frequency tokens.
- **Selection bias:** Dominant directions in the representation space are more likely to be used for encoding new information, i.e.  $\Delta\sigma_i \propto \sigma_i$

We demonstrate (c.f. Figure 4) that two conditions are necessary (see supplementary for controls) for replicating the multiphase learning dynamics in our toy-model, as observed within LLMs: (1) non-uniform class distribution, i.e. some tokens (or classes) occur more frequently than others in the training data, and (2) information bottleneck, i.e. number of feature dimensions ( $d$ ) is less than the vocabulary size ( $|\mathcal{V}|$ ). Note that these two conditions are common in LLM pretraining setups. We defer the reader to Appendix Figures 12 and 13 for control experiments that ablate each of these conditions and demonstrate a monotonic, saturating expansion of the representation space.

In the analytically tractable setup that satisfies the above conditions, we found that  $f_\theta(\cdot)$  and  $W$  for frequently-occurring classes are separated during the initial “warmup” phase (Figure 4B & C, dotted lines). The corresponding eigenvectors of the weight and feature spaces also become aligned during this phase. Following this initial eigenvector-alignment phase, there is an overall expansion in the representation space that leads to higher confidence predictions for frequently-occurring classes. This phase of volume expansion in the  $f_\theta(\cdot)$  and  $W$  spaces is associated with an increasing effective rank, akin to the “entropy-seeking” phase (Figure 4B & C, solid lines). Following this phase, the infrequently-occurring classes start to separate into their own clusters in both spaces (Figure 4B & C, dashed lines). Constrained by the information bottleneck condition, the system resorts to reusing the feature space eigenvectors and more information is selectively encoded in the dominant direction (note  $\sigma_1$  grows faster compared to  $\sigma_2$  after 200 steps in Figure 4D). This phase of anisotropic information encoding leads to a reduction in RankMe, akin to the “compression-seeking” phase. Taken together, these results suggest that gradient-based cross-entropy optimization dynamics under specific training conditions may result in non-monotonic changes in representation geometry we observed in LLMs.

**Key takeaway.** Gradient descent on cross-entropy with (i) skewed token frequencies and (ii) a representation bottleneck ( $d \ll |\mathcal{V}|$ ) suffices to produce expansion  $\rightarrow$  compression via eigenvector alignment and singular-value growth proportional to magnitude.

These mechanistic insights from simplified models establish fundamental principles governing representation geometry evolution. We now turn to examining how these geometric transformations manifest during post-training stages, where different loss functions further sculpt the representations.

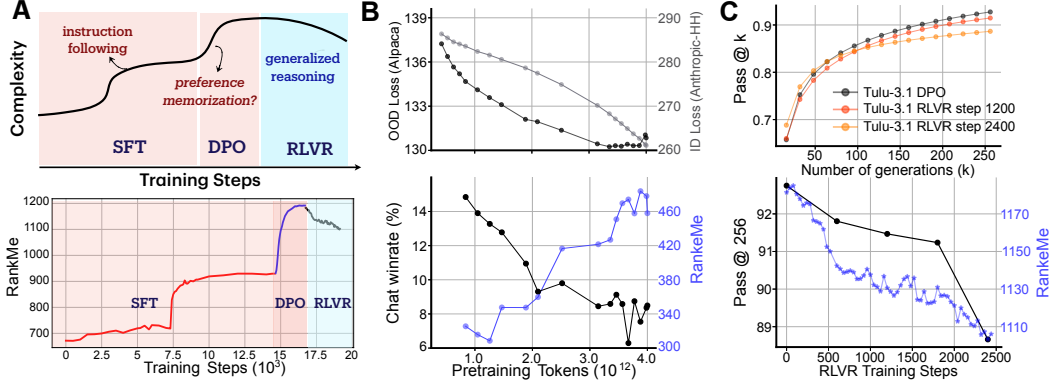

Figure 5: **Post-training induces distinct geometric transformations in model representations, aligned with specific behavioral changes.** (A) Conceptual overview of post-training (SFT, DPO and RLVR) (top), corresponding *RankMe* metrics from intermediate checkpoints of Llama-3.1-Tulu-3.1-8B (bottom) highlighting distinct progression for each stage. (B) Impact of pretraining on OLMo-2-1B SFT (Anthropic-HH): (top) longer pretraining improves in-distribution (ID) performance, while out-of-distribution (OOD) generalization (Alpaca farm) saturates (bottom) *Overtrained* models with higher RankMe exhibit markedly distinct outputs on AlpacaEval after undergoing SFT on two different datasets (Anthropic-HH and Alpaca farm). (C) RLVR post-training narrows base model’s (Llama-3.1-8B-Tulu-3-DPO) exploratory behavior on AMC-23 (particularly at higher sampling counts e.g.  $k = 256$ ), suggesting higher effective-rank facilitates better search.

### 3.4 Representation geometric changes during Post-Training stages

While pretraining establishes the initial structure of LLM representations, subsequent post-training is instrumental for refining model capabilities and aligning them with downstream objectives. Here, we investigate the geometric changes that occur during each post-training stage. Our analysis centers on the Tulu-3.1 models [Wang et al., 2024], which utilize a sequential three-stage post-training recipe — Supervised Fine-tuning (SFT), Direct Preference Optimization (DPO), and Reinforcement Learning with Verifiable Rewards (RLVR) applied to the LLaMA-3.1-8B [Grattafiori et al., 2024] base model.

**SFT exhibits “entropy-seeking”**: We find that SFT is associated with a monotonic increase in the RankMe, indicating an increase in the underlying representation manifold complexity. We hypothesize that the manifold expansion is related to instruction memorization on in-distribution (ID) examples, while reducing robustness to out-of-distribution (OOD) samples. To test this, we perform SFT with Anthropic-HH dataset on OLMo2-1B intermediate checkpoints. As shown in Figure 5 B, we find that with more pretraining the ID loss on Anthropic-HH improves monotonically, while the OOD loss (on Alpaca farm data) increases (see detailed ID/OOD loss in Appendix Figure 14). To understand the role of base-model geometry on the generalization gap, we perform SFT on Anthropic-HH (AH) and Alpaca farm (AF) datasets across checkpoints of OLMo2-1B, and measure chat winrates for AH using AF as reference on the AlpacaEval dataset. Strikingly, we find (Figure 5B bottom) that while more pretraining coincides with an increase in RankMe, the winrates decrease for AH. Notably, a drop in winrate from 14% to 9% suggests that the LLM judge is better able to distinguish between the outputs of the two instruction-tuned models. This reinforces that “overtrained” base models, exhibiting higher RankMe, are more sensitive to distribution shifts under SFT [Springer et al., 2025].

**DPO exhibits “entropy-seeking”**: Prior works in self-supervised vision pretraining [Zhai et al., 2024, Ghosh et al., 2024] have established that contrastive learning objectives, e.g. SimCLR, are associated with an increase in representation complexity, as the network progressively learns the relevant eigenfunctions [Simon et al., 2023] to separate the **positive** and **negative** examples. We observe a similar trend in the DPO stage, notably a monotonic increase (decrease) in the RankMe ( $\alpha$ ReQ), c.f. fig. 5A. This parallel between the two settings can be attributed to the analogous formulations in the objective function. Note below that eq. (3) can be written as the Noise Contrastive Estimation (NCE) loss [Gutmann and Hyvärinen, 2010], often used in contrastive vision and multimodal pretraining [Oord et al., 2018, Chen et al., 2020, Radford et al., 2021], with *one negative* example.

$$\mathcal{L}_{DPO} = -\mathbb{E}_{x, y_w, y_l} [\log(\sigma(\hat{r}_\theta(x, y_w) - \hat{r}_\theta(x, y_l)))] = -\mathbb{E}_{x, y_w, y_l} \left[ \log \frac{e^{\hat{r}_\theta(x, y_w)}}{e^{\hat{r}_\theta(x, y_w)} + e^{\hat{r}_\theta(x, y_l)}} \right] \quad (5)$$



**RLVR exhibits “compression-seeking”** : In sharp contrast to SFT and DPO, we observe that RLVR is associated with a monotonic decrease in RankMe (cf. Figure 5A). To probe the implications of this “compression-seeking” stage, we evaluate the unbiased pass@k performance on AMC-23 math benchmark. Figure 5C shows that while RLVR-training for 2400 steps outperforms the base (post-DPO) model at pass@16, the base model as well as an intermediate checkpoints outperform the RLVR-trained model at pass@256. This decline in pass@256 performance as training progresses, reinforces prior work [Yue et al., 2025] suggesting that RLVR constraints the exploratory behavior of base models while amplifying some pre-existing behaviors of the base model [Zhao et al., 2025].

**Key takeaway.** SFT/DPO (RankMe  $\uparrow$ ,  $\alpha$ ReQ  $\downarrow$ ) enhance in-distribution fit but increase sensitivity to dataset idiosyncrasies; RLVR (RankMe  $\downarrow$ ,  $\alpha$ ReQ  $\uparrow$ ) consolidates reward-aligned behaviors and narrows high- $k$  exploration (pass@ $k$ ), consistent with reduced solution diversity.

## 4 Related Work

**Dynamics of Knowledge Acquisition and Representation Learning** A central theme in understanding neural networks is that learning is a dynamic, often phased process rather than a monolithic one. Recent work by Zucchet et al. [2025] identified distinct stages in how LLMs learn factual information, highlighting the formation of critical internal structures like attention circuits during performance plateaus. This notion of staged learning is further supported by the "Distributional Simplicity Bias" (DSB) established by Refinetti et al. [2023], Belrose et al. [2024], which posits that networks learn simpler statistical properties of data (e.g., lower-order moments) before more complex ones. Our work provides a geometric lens on these phenomena, using spectral measures to track how the effective dimensionality of representations evolve non-monotonically. Furthermore, Michaud et al. [2023] proposed that scaling laws and emergent abilities arise from learning discrete "quanta" of knowledge. DeMoss et al. [2024] explained grokking [Power et al., 2022] as a transition from high-complexity memorization to low-complexity generalization, measured via algorithmic information theory. Our spectral geometric phases offer a complementary perspective that could underpin these observed emergent jumps in performance and the dynamics of grokking.

**Post-Training Alignment and Reasoning** The adaptation of pretrained LLMs through fine-tuning is critical for aligning them with specific tasks and user preferences. Ren and Sutherland [2024] provided an empirical-NTK based framework to decompose the influence of fine-tuning updates, explaining complex behaviors such as hallucination amplification in SFT and the "squeezing effect" in DPO, where confidence in desired outputs can paradoxically decrease. Concurrently, Springer et al. [2025] identified "catastrophic overtraining," showing that excessive pretraining can make models overly sensitive to parameter changes, thereby degrading performance after SFT. Our work contributes to this area by demonstrating that different post-training strategies (SFT, DPO, RLVR) induce distinct transformations in the geometry and its influence model capabilities.

## 5 Discussions

**Geometry of Pretraining: Memorization vs Generalization.** We show that LLM pretraining is multiphasic rather than monotonic, characterized mainly by “entropy-seeking” and “compression-seeking” phases. The observed geometric phases provide a quantitative framework for examining the relationship between memorizing short-context statistics and generalizing long-context information. The “entropy-seeking” phase expands the representational space to capture various short-context patterns, including n-gram memorization. Conversely, the “compression-seeking” phase promotes a more structured manifold and is likely to incentivize generalizable long-range language understanding. This geometric refinement process is consistent with and may offer an explanation for phenomena like *grokking*, where generalization capabilities can emerge after an initial period of fitting.

Our preliminary analysis further reveals the importance of full-spectrum information for model performance. When we ablate eigenvectors to retain only the top-k principal components, SciQ accuracy degrades dramatically (Appendix Table 8). For instance, retaining only the top 10 eigen-directions reduces Pythia-1B’s accuracy from 0.838 to 0.225, while OLMo-2-7B drops from 0.970 to 0.155. Interestingly, removing the top eigen-directions has minimal impact, suggesting that information is distributed across the full spectrum rather than concentrated solely in dominant directions. This finding validates our use of full-spectrum metrics like RankMe and  $\alpha$ ReQ rather than top-k proxies, and underscores that effective language understanding requires the entire representational mani-

fold—not just its principal components. The necessity of preserving full spectral information aligns with the “compression-seeking” phase’s anisotropic consolidation, which selectively strengthens certain directions while maintaining distributed representations across the manifold.

**Geometry of Post-Training: Alignment vs Exploration.** Different post-training recipes induce distinct shifts in LLM representation geometry, potentially explaining the model’s behavioral changes. Supervised Fine-Tuning (SFT) typically drives an “entropy-seeking” dynamic, expanding the representational manifold for specific instruction-response examples. This manifold expansion can be seen as evidence for lazy-regime learning [Ren and Sutherland, 2024] during SFT, and points to a near-diagonal empirical NTK that results in an instance-level learning dynamics. Consequently, this dynamic improves in-distribution performance but risks overfitting due to higher representational capacity. In contrast, Reinforcement Learning from Verifiable Rewards (RLVR) promotes a “compression-seeking” dynamic, refining representations towards reward-aligned directions. This geometric compression may explain how RLVR amplifies and refines existing capabilities [Zhao et al., 2025], potentially by constraining representations to a more structured subspace while reducing its exploration ability [Yue et al., 2025]. In summary, SFT/DPO-induced rank expansion may foster preference memorization and exploratory behavior, while RLVR-induced consolidation amplifies model-capabilities towards reward-oriented, less diverse generation (c.f. Figure 5C).

**Limitations and Future Work** Tracing a model’s geometry, whether “entropy-seeking” or “compression-seeking”, could inform more effective interventions for LLM development and evaluation, such as the selection of optimal pretraining checkpoints for targeted fine-tuning or designing training strategies that deliberately navigate these geometric phases. Our findings have several limitations: (i) computational constraints limited our analysis to models up to 12B parameters, though the phases persist across scales from 160M to 12B; (ii) spectral metric computation requires  $\sim 10K$  samples and scales quadratically with hidden dimension (iii) our theoretical analysis assumes simplified linear feature extractors, leaving the extension to full transformer architectures as future work; (iv) we focused on English-language models trained with standard objectives, and whether similar phases emerge in multilingual or alternatively-trained models remains unexplored. Furthermore, our findings are primarily correlational; establishing causal connections between geometric dynamics and emergent capabilities requires additional investigation.

## 6 Conclusion

We show that LLMs undergo non-monotonic representation geometry changes, often masked by steadily decreasing training loss. By employing spectral metrics of feature covariates (RankMe and  $\alpha$ ReQ), we delineate three distinct pretraining phases: “warmup”, “entropy-seeking” (correlating with n-gram memorization), and “compression-seeking” (correlating with long-context generalization). We further demonstrate that post-training recipes induce specific geometric changes: SFT/DPO exhibit “entropy-seeking” dynamics, whereas RLVR exhibit “compression-seeking” dynamics. These results provide a quantitative framework for guiding future advancements in LLM development.

**Impact Statement** The goal of our work is to advance the understanding of internal representations of LLMs. Although there are potential downstream societal consequences of this technology, we feel there are no direct consequences that must be specifically highlighted here.

## Acknowledgments

The authors would like to thank Koustuv Sinha for insightful discussions that helped shape the scope of the project and Jacob Mitchell Springer for helping setup the OLMo-2 supervised finetuning pipeline. We are grateful to the OLMo team, particularly Nathan Lambert, Dirk Groeneveld, and Bailey Kuehl, for providing access to the OLMo-2 checkpoints (especially OLMo-2-1B) that enabled this research. The authors are also grateful to Daniel Levenstein, Johannes von Oswald, Jonathan Cornford, Mandana Samiei, Tejas Vaidhya, and Zahraa Chorghay for their comments and feedback. A.G. was supported by Vanier Canada Graduate Scholarship. G.L. was supported by NSERC (Discovery Grant RGPIN2018-04821), the Canada Research Chair in Neural Computations and Interfacing, CIFAR (Canada AI Chair), as well as IVADO and the Canada First Research Excellence Fund. B.A.R. was supported by NSERC (Discovery Grant: RGPIN-2020-05105; Discovery Accelerator Supplement: RGPAS-2020-00031) and CIFAR (Canada AI Chair; Learning in Machines and Brains Fellowship).

The authors also acknowledge the material support of NVIDIA in the form of computational resources, as well as the compute resources, software and technical help provided by Mila (mila.quebec).

## References

- Kumar K Agrawal, Arnab Kumar Mondal, Arna Ghosh, and Blake Richards.  $\alpha$ -req: Assessing representation quality in self-supervised learning by measuring eigenspectrum decay. *Advances in Neural Information Processing Systems*, 35:17626–17638, 2022.
- Peter L Bartlett, Philip M Long, Gábor Lugosi, and Alexander Tsigler. Benign overfitting in linear regression. *Proceedings of the National Academy of Sciences*, 117(48):30063–30070, 2020.
- Nora Belrose, Quintin Pope, Lucia Quirke, Alex Mallen, and Xiaoli Fern. Neural networks learn statistics of increasing complexity. *arXiv preprint arXiv:2402.04362*, 2024.
- Stella Biderman, Hailey Schoelkopf, Quentin Gregory Anthony, Herbie Bradley, Kyle O’Brien, Eric Hallahan, Mohammad Aflah Khan, Shivanshu Purohit, USVSN Sai Prashanth, Edward Raff, et al. Pythia: A suite for analyzing large language models across training and scaling. In *International Conference on Machine Learning*, pages 2397–2430. PMLR, 2023.
- Davis Brown, Charles Godfrey, Nicholas Konz, Jonathan Tu, and Henry Kvinge. Understanding the inner-workings of language models through representation dissimilarity. In *The 2023 Conference on Empirical Methods in Natural Language Processing*, 2023.
- Mark Chen, Jerry Tworek, Heewoo Jun, Qiming Yuan, Henrique Ponde De Oliveira Pinto, Jared Kaplan, Harri Edwards, Yuri Burda, Nicholas Joseph, Greg Brockman, et al. Evaluating large language models trained on code. *arXiv preprint arXiv:2107.03374*, 2021.
- Ting Chen, Simon Kornblith, Mohammad Norouzi, and Geoffrey Hinton. A simple framework for contrastive learning of visual representations. In *International conference on machine learning*, pages 1597–1607. PmLR, 2020.
- Branton DeMoss, Silvia Sapora, Jakob Foerster, Nick Hawes, and Ingmar Posner. The complexity dynamics of grokking. *arXiv preprint arXiv:2412.09810*, 2024.
- Yann Dubois, Xuechen Li, Rohan Taori, Tianyi Zhang, Ishaan Gulrajani, Jimmy Ba, Carlos Guestrin, Percy Liang, and Tatsunori B. Hashimoto. AlpacaFarm: A simulation framework for methods that learn from human feedback, 2023.
- Deep Ganguli, Danny Hernandez, Liane Lovitt, Amanda Askell, Yuntao Bai, Anna Chen, Tom Conerly, Nova Dassarma, Dawn Drain, Nelson Elhage, et al. Predictability and surprise in large generative models. In *Proceedings of the 2022 ACM Conference on Fairness, Accountability, and Transparency*, pages 1747–1764, 2022.
- Leo Gao, Stella Biderman, Sid Black, Laurence Golding, Travis Hoppe, Charles Foster, Jason Phang, Horace He, Anish Thite, Noa Nabeshima, et al. The pile: An 800gb dataset of diverse text for language modeling. *arXiv preprint arXiv:2101.00027*, 2020.
- Quentin Garrido, Randall Balestriero, Laurent Najman, and Yann Lecun. Rankme: Assessing the downstream performance of pretrained self-supervised representations by their rank. In *International Conference on Machine Learning*, pages 10929–10974. PMLR, 2023.
- Arna Ghosh, Arnab Kumar Mondal, Kumar Krishna Agrawal, and Blake Richards. Investigating power laws in deep representation learning. *arXiv preprint arXiv:2202.05808*, 2022.
- Arna Ghosh, Kumar Krishna Agrawal, Shagun Sodhani, Adam Oberman, and Blake Richards. Harnessing small projectors and multiple views for efficient vision pretraining. *Advances in Neural Information Processing Systems*, 37:39837–39868, 2024.
- Aaron Grattafiori, Abhimanyu Dubey, Abhinav Jauhri, Abhinav Pandey, Abhishek Kadian, Ahmad Al-Dahle, Aiesha Letman, Akhil Mathur, Alan Schelten, Alex Vaughan, et al. The llama 3 herd of models. *arXiv preprint arXiv:2407.21783*, 2024.

- Dirk Groeneveld, Iz Beltagy, Pete Walsh, Akshita Bhagia, Rodney Kinney, Oyvind Tafjord, Ananya Harsh Jha, Hamish Ivison, Ian Magnusson, Yizhong Wang, et al. Olmo: Accelerating the science of language models. *arXiv preprint arXiv:2402.00838*, 2024.
- Michael Gutmann and Aapo Hyvärinen. Noise-contrastive estimation: A new estimation principle for unnormalized statistical models. In *Proceedings of the thirteenth international conference on artificial intelligence and statistics*, pages 297–304. JMLR Workshop and Conference Proceedings, 2010.
- Jordan Hoffmann, Sebastian Borgeaud, Arthur Mensch, Elena Buchatskaya, Trevor Cai, Eliza Rutherford, Diego de Las Casas, Lisa Anne Hendricks, Johannes Welbl, Aidan Clark, et al. Training compute-optimal large language models. In *Proceedings of the 36th International Conference on Neural Information Processing Systems*, pages 30016–30030, 2022.
- Mandar Joshi, Eunsol Choi, Daniel S Weld, and Luke Zettlemoyer. Triviaqa: A large scale distantly supervised challenge dataset for reading comprehension. In *Proceedings of the 55th Annual Meeting of the Association for Computational Linguistics (Volume 1: Long Papers)*, pages 1601–1611, 2017.
- Jared Kaplan, Sam McCandlish, Tom Henighan, Tom B Brown, Benjamin Chess, Rewon Child, Scott Gray, Alec Radford, Jeffrey Wu, and Dario Amodei. Scaling laws for neural language models. *arXiv preprint arXiv:2001.08361*, 2020.
- Sumith Kulal, Panupong Pasupat, Kartik Chandra, Mina Lee, Oded Padon, Alex Aiken, and Percy S Liang. Spoc: Search-based pseudocode to code. *Advances in Neural Information Processing Systems*, 32, 2019.
- Nathan Lambert, Jacob Morrison, Valentina Pyatkin, Shengyi Huang, Hamish Ivison, Faeze Brahman, Lester James V Miranda, Alisa Liu, Nouha Dziri, Shane Lyu, et al. Tulu 3: Pushing frontiers in open language model post-training. *arXiv preprint arXiv:2411.15124*, 2024.
- Jiacheng Liu, Sewon Min, Luke Zettlemoyer, Yejin Choi, and Hannaneh Hajishirzi. Infini-gram: Scaling unbounded n-gram language models to a trillion tokens. In *First Conference on Language Modeling*, 2024.
- Chao Lou, Zixia Jia, Zilong Zheng, and Kewei Tu. Sparser is faster and less is more: Efficient sparse attention for long-range transformers. *arXiv preprint arXiv:2406.16747*, 2024.
- Stephen Merity, Caiming Xiong, James Bradbury, and Richard Socher. Pointer sentinel mixture models, 2016.
- Eric Michaud, Ziming Liu, Uzay Girit, and Max Tegmark. The quantization model of neural scaling. *Advances in Neural Information Processing Systems*, 36:28699–28722, 2023.
- Team OLMo, Pete Walsh, Luca Soldaini, Dirk Groeneveld, Kyle Lo, Shane Arora, Akshita Bhagia, Yuling Gu, Shengyi Huang, Matt Jordan, et al. 2 olmo 2 furious. *arXiv preprint arXiv:2501.00656*, 2024.
- Aaron van den Oord, Yazhe Li, and Oriol Vinyals. Representation learning with contrastive predictive coding. *arXiv preprint arXiv:1807.03748*, 2018.
- Guilherme Penedo, Hynek Kydlíček, Loubna Ben allal, Anton Lozhkov, Margaret Mitchell, Colin Raffel, Leandro Von Werra, and Thomas Wolf. The fineweb datasets: Decanting the web for the finest text data at scale. In *The Thirty-eight Conference on Neural Information Processing Systems Datasets and Benchmarks Track*, 2024. URL <https://openreview.net/forum?id=n6SCkn2QaG>.
- Mohammad Pezeshki, Oumar Kaba, Yoshua Bengio, Aaron C Courville, Doina Precup, and Guillaume Lajoie. Gradient starvation: A learning proclivity in neural networks. *Advances in Neural Information Processing Systems*, 34:1256–1272, 2021.
- Alethea Power, Yuri Burda, Harri Edwards, Igor Babuschkin, and Vedant Misra. Grokking: Generalization beyond overfitting on small algorithmic datasets. *arXiv preprint arXiv:2201.02177*, 2022.

- Alec Radford, Jeffrey Wu, Rewon Child, David Luan, Dario Amodei, Ilya Sutskever, et al. Language models are unsupervised multitask learners. *OpenAI blog*, 1(8):9, 2019.
- Alec Radford, Jong Wook Kim, Chris Hallacy, Aditya Ramesh, Gabriel Goh, Sandhini Agarwal, Girish Sastry, Amanda Askell, Pamela Mishkin, Jack Clark, et al. Learning transferable visual models from natural language supervision. In *International conference on machine learning*, pages 8748–8763. PmLR, 2021.
- Rafael Rafailov, Archit Sharma, Eric Mitchell, Christopher D Manning, Stefano Ermon, and Chelsea Finn. Direct preference optimization: Your language model is secretly a reward model. *Advances in Neural Information Processing Systems*, 36:53728–53741, 2023.
- Maria Refinetti, Alessandro Ingrosso, and Sebastian Goldt. Neural networks trained with sgd learn distributions of increasing complexity. In *International Conference on Machine Learning*, pages 28843–28863. PMLR, 2023.
- Yi Ren and Danica J Sutherland. Learning dynamics of llm finetuning. *arXiv preprint arXiv:2407.10490*, 2024.
- Olivier Roy and Martin Vetterli. The effective rank: A measure of effective dimensionality. In *2007 15th European signal processing conference*, pages 606–610. IEEE, 2007.
- Zhihong Shao, Peiyi Wang, Qihao Zhu, Runxin Xu, Junxiao Song, Xiao Bi, Haowei Zhang, Mingchuan Zhang, YK Li, Y Wu, et al. Deepseekmath: Pushing the limits of mathematical reasoning in open language models. *arXiv preprint arXiv:2402.03300*, 2024.
- James B Simon, Maksis Knutins, Liu Ziyin, Daniel Geisz, Abraham J Fetterman, and Joshua Albrecht. On the stepwise nature of self-supervised learning. In *International Conference on Machine Learning*, pages 31852–31876. PMLR, 2023.
- Aaditya Singh, Stephanie Chan, Ted Moskovitz, Erin Grant, Andrew Saxe, and Felix Hill. The transient nature of emergent in-context learning in transformers. *Advances in Neural Information Processing Systems*, 36:27801–27819, 2023.
- Sidak Pal Singh, Bobby He, Thomas Hofmann, and Bernhard Schölkopf. Hallmarks of optimization trajectories in neural networks: Directional exploration and redundancy. *arXiv preprint arXiv:2403.07379*, 2024.
- Jacob Mitchell Springer, Sachin Goyal, Kaiyue Wen, Tanishq Kumar, Xiang Yue, Sadhika Malladi, Graham Neubig, and Aditi Raghunathan. Overtrained language models are harder to fine-tune. *arXiv preprint arXiv:2503.19206*, 2025.
- Carsen Stringer, Marius Pachitariu, Nicholas Steinmetz, Matteo Carandini, and Kenneth D Harris. High-dimensional geometry of population responses in visual cortex. *Nature*, 571(7765):361–365, 2019.
- Vimal Thilak, Chen Huang, Omid Saremi, Laurent Dinh, Hanlin Goh, Preetum Nakkiran, Joshua M Susskind, and Etai Littwin. Lidar: Sensing linear probing performance in joint embedding ssl architectures. *arXiv preprint arXiv:2312.04000*, 2023.
- Xinyi Wang, Antonis Antoniadis, Yanai Elazar, Alfonso Amayuelas, Alon Albalak, Kexun Zhang, and William Yang Wang. Generalization v.s. memorization: Tracing language models’ capabilities back to pretraining data. In *The Thirteenth International Conference on Learning Representations*, 2025. URL <https://openreview.net/forum?id=IQxBDLmVpT>.
- Yizhong Wang, Ximing Li, Siqi Wang, Yash Khandwala, Aashi Anand, Yushi Yang, Sewon Lee, Hannaneh Hajishirzi, and Noah A Smith. Tulu 3: Pushing frontiers in open language model post-training. *arXiv preprint arXiv:2404.07810*, 2024.
- Jason Wei, Yi Tay, Rishi Bommasani, Colin Raffel, Barret Zoph, Sebastian Borgeaud, Dani Yogatama, Maarten Bosma, Denny Zhou, Donald Metzler, et al. Emergent abilities of large language models. *Transactions on Machine Learning Research*, 2022.

Johannes Welbl, Nelson F Liu, and Matt Gardner. Crowdsourcing multiple choice science questions. *arXiv preprint arXiv:1707.06209*, 2017.

Yang Yue, Zhiqi Chen, Rui Lu, Andrew Zhao, Zhaokai Wang, Shiji Song, and Gao Huang. Does reinforcement learning really incentivize reasoning capacity in llms beyond the base model? *arXiv preprint arXiv:2504.13837*, 2025.

Runtian Zhai, Bingbin Liu, Andrej Risteski, J. Zico Kolter, and Pradeep Kumar Ravikumar. Understanding augmentation-based self-supervised representation learning via RKHS approximation and regression. In *The Twelfth International Conference on Learning Representations, ICLR 2024, Vienna, Austria, May 7-11, 2024*. OpenReview.net, 2024. URL <https://openreview.net/forum?id=Ax2yRhCQr1>.

Rosie Zhao, Alexandru Meterez, Sham Kakade, Cengiz Pehlevan, Samy Jelassi, and Eran Malach. Echo chamber: RL post-training amplifies behaviors learned in pretraining. *arXiv preprint arXiv:2504.07912*, 2025.

Nicolas Zucchet, Jörg Bornschein, Stephanie Chan, Andrew Lampinen, Razvan Pascanu, and Soham De. How do language models learn facts? dynamics, curricula and hallucinations. *arXiv preprint arXiv:2503.21676*, 2025.

## NeurIPS Paper Checklist

### 1. Claims

Question: Do the main claims made in the abstract and introduction accurately reflect the paper’s contributions and scope?

Answer: [Yes]

Justification: We have emphasized the main contribution of this paper in both the abstract and instruction sections—namely, that large language models exhibit distinct geometric phases throughout pretraining and post-training.

Guidelines:

- The answer NA means that the abstract and introduction do not include the claims made in the paper.
- The abstract and/or introduction should clearly state the claims made, including the contributions made in the paper and important assumptions and limitations. A No or NA answer to this question will not be perceived well by the reviewers.
- The claims made should match theoretical and experimental results, and reflect how much the results can be expected to generalize to other settings.
- It is fine to include aspirational goals as motivation as long as it is clear that these goals are not attained by the paper.

### 2. Limitations

Question: Does the paper discuss the limitations of the work performed by the authors?

Answer: [Yes]

Justification: We have discussed the limitations of our work in Section 5.

Guidelines:

- The answer NA means that the paper has no limitation while the answer No means that the paper has limitations, but those are not discussed in the paper.
- The authors are encouraged to create a separate "Limitations" section in their paper.
- The paper should point out any strong assumptions and how robust the results are to violations of these assumptions (e.g., independence assumptions, noiseless settings, model well-specification, asymptotic approximations only holding locally). The authors should reflect on how these assumptions might be violated in practice and what the implications would be.



- The authors should reflect on the scope of the claims made, e.g., if the approach was only tested on a few datasets or with a few runs. In general, empirical results often depend on implicit assumptions, which should be articulated.
- The authors should reflect on the factors that influence the performance of the approach. For example, a facial recognition algorithm may perform poorly when image resolution is low or images are taken in low lighting. Or a speech-to-text system might not be used reliably to provide closed captions for online lectures because it fails to handle technical jargon.
- The authors should discuss the computational efficiency of the proposed algorithms and how they scale with dataset size.
- If applicable, the authors should discuss possible limitations of their approach to address problems of privacy and fairness.
- While the authors might fear that complete honesty about limitations might be used by reviewers as grounds for rejection, a worse outcome might be that reviewers discover limitations that aren't acknowledged in the paper. The authors should use their best judgment and recognize that individual actions in favor of transparency play an important role in developing norms that preserve the integrity of the community. Reviewers will be specifically instructed to not penalize honesty concerning limitations.

### 3. Theory assumptions and proofs

Question: For each theoretical result, does the paper provide the full set of assumptions and a complete (and correct) proof?

Answer: [\[Yes\]](#)

Justification: We provide an informal version of our theoretical results in Section 3.3 and the corresponding formal versions and proofs in Appendix B.

Guidelines:

- The answer NA means that the paper does not include theoretical results.
- All the theorems, formulas, and proofs in the paper should be numbered and cross-referenced.
- All assumptions should be clearly stated or referenced in the statement of any theorems.
- The proofs can either appear in the main paper or the supplemental material, but if they appear in the supplemental material, the authors are encouraged to provide a short proof sketch to provide intuition.
- Inversely, any informal proof provided in the core of the paper should be complemented by formal proofs provided in appendix or supplemental material.
- Theorems and Lemmas that the proof relies upon should be properly referenced.

### 4. Experimental result reproducibility

Question: Does the paper fully disclose all the information needed to reproduce the main experimental results of the paper to the extent that it affects the main claims and/or conclusions of the paper (regardless of whether the code and data are provided or not)?

Answer: [\[Yes\]](#)

Justification: We provide a detailed description of the methods used in our work in Section 2 and experimental setups in Section 3. We provide further details of individual experiments, including specific model architecture, datasets used and training run configurations in the Appendix.

Guidelines:

- The answer NA means that the paper does not include experiments.
- If the paper includes experiments, a No answer to this question will not be perceived well by the reviewers: Making the paper reproducible is important, regardless of whether the code and data are provided or not.
- If the contribution is a dataset and/or model, the authors should describe the steps taken to make their results reproducible or verifiable.

- Depending on the contribution, reproducibility can be accomplished in various ways. For example, if the contribution is a novel architecture, describing the architecture fully might suffice, or if the contribution is a specific model and empirical evaluation, it may be necessary to either make it possible for others to replicate the model with the same dataset, or provide access to the model. In general, releasing code and data is often one good way to accomplish this, but reproducibility can also be provided via detailed instructions for how to replicate the results, access to a hosted model (e.g., in the case of a large language model), releasing of a model checkpoint, or other means that are appropriate to the research performed.
- While NeurIPS does not require releasing code, the conference does require all submissions to provide some reasonable avenue for reproducibility, which may depend on the nature of the contribution. For example
  - (a) If the contribution is primarily a new algorithm, the paper should make it clear how to reproduce that algorithm.
  - (b) If the contribution is primarily a new model architecture, the paper should describe the architecture clearly and fully.
  - (c) If the contribution is a new model (e.g., a large language model), then there should either be a way to access this model for reproducing the results or a way to reproduce the model (e.g., with an open-source dataset or instructions for how to construct the dataset).
  - (d) We recognize that reproducibility may be tricky in some cases, in which case authors are welcome to describe the particular way they provide for reproducibility. In the case of closed-source models, it may be that access to the model is limited in some way (e.g., to registered users), but it should be possible for other researchers to have some path to reproducing or verifying the results.

## 5. Open access to data and code

Question: Does the paper provide open access to the data and code, with sufficient instructions to faithfully reproduce the main experimental results, as described in supplemental material?

Answer: [\[Yes\]](#)

Justification: We used open-access datasets and models and plan to release our code base on Github in the near future.

Guidelines:

- The answer NA means that paper does not include experiments requiring code.
- Please see the NeurIPS code and data submission guidelines (<https://nips.cc/public/guides/CodeSubmissionPolicy>) for more details.
- While we encourage the release of code and data, we understand that this might not be possible, so “No” is an acceptable answer. Papers cannot be rejected simply for not including code, unless this is central to the contribution (e.g., for a new open-source benchmark).
- The instructions should contain the exact command and environment needed to run to reproduce the results. See the NeurIPS code and data submission guidelines (<https://nips.cc/public/guides/CodeSubmissionPolicy>) for more details.
- The authors should provide instructions on data access and preparation, including how to access the raw data, preprocessed data, intermediate data, and generated data, etc.
- The authors should provide scripts to reproduce all experimental results for the new proposed method and baselines. If only a subset of experiments are reproducible, they should state which ones are omitted from the script and why.
- At submission time, to preserve anonymity, the authors should release anonymized versions (if applicable).
- Providing as much information as possible in supplemental material (appended to the paper) is recommended, but including URLs to data and code is permitted.

## 6. Experimental setting/details

Question: Does the paper specify all the training and test details (e.g., data splits, hyperparameters, how they were chosen, type of optimizer, etc.) necessary to understand the results?

Answer: [Yes]

Justification: We provide a detailed description of our experimental setups in Section 3. We provide further details of individual experiments, including specific model architecture, datasets used and training run configurations in the Appendix A.

Guidelines:

- The answer NA means that the paper does not include experiments.
- The experimental setting should be presented in the core of the paper to a level of detail that is necessary to appreciate the results and make sense of them.
- The full details can be provided either with the code, in appendix, or as supplemental material.

## 7. Experiment statistical significance

Question: Does the paper report error bars suitably and correctly defined or other appropriate information about the statistical significance of the experiments?

Answer: [Yes]

Justification: To ensure the reliability of our findings, we repeated our experiments on multiple subsets of data and reported the standard error as shaded error bars in the figures. Since our work leverages open-access large models, we are unable to run experiments across several seeds to account for randomness in model training.

Guidelines:

- The answer NA means that the paper does not include experiments.
- The authors should answer "Yes" if the results are accompanied by error bars, confidence intervals, or statistical significance tests, at least for the experiments that support the main claims of the paper.
- The factors of variability that the error bars are capturing should be clearly stated (for example, train/test split, initialization, random drawing of some parameter, or overall run with given experimental conditions).
- The method for calculating the error bars should be explained (closed form formula, call to a library function, bootstrap, etc.)
- The assumptions made should be given (e.g., Normally distributed errors).
- It should be clear whether the error bar is the standard deviation or the standard error of the mean.
- It is OK to report 1-sigma error bars, but one should state it. The authors should preferably report a 2-sigma error bar than state that they have a 96% CI, if the hypothesis of Normality of errors is not verified.
- For asymmetric distributions, the authors should be careful not to show in tables or figures symmetric error bars that would yield results that are out of range (e.g. negative error rates).
- If error bars are reported in tables or plots, The authors should explain in the text how they were calculated and reference the corresponding figures or tables in the text.

## 8. Experiments compute resources

Question: For each experiment, does the paper provide sufficient information on the computer resources (type of compute workers, memory, time of execution) needed to reproduce the experiments?

Answer: [Yes]

Justification: We present rough details about our compute infrastructure in the Appendix. Due to the double-blind policy, we refrain from providing exact details of the compute infrastructure used in our experiments. However, this information will be added to the Appendix upon acceptance.

Guidelines:

- The answer NA means that the paper does not include experiments.
- The paper should indicate the type of compute workers CPU or GPU, internal cluster, or cloud provider, including relevant memory and storage.

- The paper should provide the amount of compute required for each of the individual experimental runs as well as estimate the total compute.
- The paper should disclose whether the full research project required more compute than the experiments reported in the paper (e.g., preliminary or failed experiments that didn't make it into the paper).

#### 9. Code of ethics

Question: Does the research conducted in the paper conform, in every respect, with the NeurIPS Code of Ethics <https://neurips.cc/public/EthicsGuidelines>?

Answer: [Yes]

Justification: Our study (1) does not involve any interaction with human subjects, and (2) utilizes datasets that do not contain personally identifiable information, have not been withdrawn by their authors, and are not included on the NeurIPS list of deprecated datasets.

Guidelines:

- The answer NA means that the authors have not reviewed the NeurIPS Code of Ethics.
- If the authors answer No, they should explain the special circumstances that require a deviation from the Code of Ethics.
- The authors should make sure to preserve anonymity (e.g., if there is a special consideration due to laws or regulations in their jurisdiction).

#### 10. Broader impacts

Question: Does the paper discuss both potential positive societal impacts and negative societal impacts of the work performed?

Answer: [Yes]

Justification: An impact statement has been included in the conclusions.

Guidelines:

- The answer NA means that there is no societal impact of the work performed.
- If the authors answer NA or No, they should explain why their work has no societal impact or why the paper does not address societal impact.
- Examples of negative societal impacts include potential malicious or unintended uses (e.g., disinformation, generating fake profiles, surveillance), fairness considerations (e.g., deployment of technologies that could make decisions that unfairly impact specific groups), privacy considerations, and security considerations.
- The conference expects that many papers will be foundational research and not tied to particular applications, let alone deployments. However, if there is a direct path to any negative applications, the authors should point it out. For example, it is legitimate to point out that an improvement in the quality of generative models could be used to generate deepfakes for disinformation. On the other hand, it is not needed to point out that a generic algorithm for optimizing neural networks could enable people to train models that generate Deepfakes faster.
- The authors should consider possible harms that could arise when the technology is being used as intended and functioning correctly, harms that could arise when the technology is being used as intended but gives incorrect results, and harms following from (intentional or unintentional) misuse of the technology.
- If there are negative societal impacts, the authors could also discuss possible mitigation strategies (e.g., gated release of models, providing defenses in addition to attacks, mechanisms for monitoring misuse, mechanisms to monitor how a system learns from feedback over time, improving the efficiency and accessibility of ML).

#### 11. Safeguards

Question: Does the paper describe safeguards that have been put in place for responsible release of data or models that have a high risk for misuse (e.g., pretrained language models, image generators, or scraped datasets)?

Answer: [NA]

Justification: We did not train any large-scale models or curate datasets for public release in this work.

Guidelines:

- The answer NA means that the paper poses no such risks.
- Released models that have a high risk for misuse or dual-use should be released with necessary safeguards to allow for controlled use of the model, for example by requiring that users adhere to usage guidelines or restrictions to access the model or implementing safety filters.
- Datasets that have been scraped from the Internet could pose safety risks. The authors should describe how they avoided releasing unsafe images.
- We recognize that providing effective safeguards is challenging, and many papers do not require this, but we encourage authors to take this into account and make a best faith effort.

## 12. Licenses for existing assets

Question: Are the creators or original owners of assets (e.g., code, data, models), used in the paper, properly credited and are the license and terms of use explicitly mentioned and properly respected?

Answer: [\[Yes\]](#)

Justification: We cite the datasets and models used in this work.

Guidelines:

- The answer NA means that the paper does not use existing assets.
- The authors should cite the original paper that produced the code package or dataset.
- The authors should state which version of the asset is used and, if possible, include a URL.
- The name of the license (e.g., CC-BY 4.0) should be included for each asset.
- For scraped data from a particular source (e.g., website), the copyright and terms of service of that source should be provided.
- If assets are released, the license, copyright information, and terms of use in the package should be provided. For popular datasets, [paperswithcode.com/datasets](https://paperswithcode.com/datasets) has curated licenses for some datasets. Their licensing guide can help determine the license of a dataset.
- For existing datasets that are re-packaged, both the original license and the license of the derived asset (if it has changed) should be provided.
- If this information is not available online, the authors are encouraged to reach out to the asset's creators.

## 13. New assets

Question: Are new assets introduced in the paper well documented and is the documentation provided alongside the assets?

Answer: [\[NA\]](#)

Justification: No assets are released.

Guidelines:

- The answer NA means that the paper does not release new assets.
- Researchers should communicate the details of the dataset/code/model as part of their submissions via structured templates. This includes details about training, license, limitations, etc.
- The paper should discuss whether and how consent was obtained from people whose asset is used.
- At submission time, remember to anonymize your assets (if applicable). You can either create an anonymized URL or include an anonymized zip file.

## 14. Crowdsourcing and research with human subjects

Question: For crowdsourcing experiments and research with human subjects, does the paper include the full text of instructions given to participants and screenshots, if applicable, as well as details about compensation (if any)?

Answer: [NA]

Justification: This work neither involves crowdsourcing nor research with human subjects.

Guidelines:

- The answer NA means that the paper does not involve crowdsourcing nor research with human subjects.
- Including this information in the supplemental material is fine, but if the main contribution of the paper involves human subjects, then as much detail as possible should be included in the main paper.
- According to the NeurIPS Code of Ethics, workers involved in data collection, curation, or other labor should be paid at least the minimum wage in the country of the data collector.

**15. Institutional review board (IRB) approvals or equivalent for research with human subjects**

Question: Does the paper describe potential risks incurred by study participants, whether such risks were disclosed to the subjects, and whether Institutional Review Board (IRB) approvals (or an equivalent approval/review based on the requirements of your country or institution) were obtained?

Answer: [NA]

Justification: Not applicable.

Guidelines:

- The answer NA means that the paper does not involve crowdsourcing nor research with human subjects.
- Depending on the country in which research is conducted, IRB approval (or equivalent) may be required for any human subjects research. If you obtained IRB approval, you should clearly state this in the paper.
- We recognize that the procedures for this may vary significantly between institutions and locations, and we expect authors to adhere to the NeurIPS Code of Ethics and the guidelines for their institution.
- For initial submissions, do not include any information that would break anonymity (if applicable), such as the institution conducting the review.

**16. Declaration of LLM usage**

Question: Does the paper describe the usage of LLMs if it is an important, original, or non-standard component of the core methods in this research? Note that if the LLM is used only for writing, editing, or formatting purposes and does not impact the core methodology, scientific rigor, or originality of the research, declaration is not required.

Answer: [NA]

Justification: No LLMs usage.

Guidelines:

- The answer NA means that the core method development in this research does not involve LLMs as any important, original, or non-standard components.
- Please refer to our LLM policy (<https://neurips.cc/Conferences/2025/LLM>) for what should or should not be described.



## A Model and Dataset Details

### A.1 Model Architecture and training configurations

Table 1: Comparison of model architectures and training setups.

|                           | <b>Pythia</b>     | <b>OLMo-2</b>          |
|---------------------------|-------------------|------------------------|
| <b>Position Embedding</b> | Learned           | Rotary (RoPE)          |
| <b>Norm Type</b>          | LayerNorm         | RMSNorm                |
| <b>Norm Position</b>      | Pre-layer         | Pre-layer              |
| <b>Dataset</b>            | The Pile (825 GB) | OLMoStack (4T tokens)  |
| <b>Optimizer</b>          | AdamW             | AdamW                  |
| <b>LR Scheduler</b>       | Cosine decay      | Linear decay w/ warmup |
| <b>Loss Function</b>      | Cross-Entropy     | Cross-Entropy          |

Table 2: Tülu Model Architecture and Training Setup

| <b>Component</b>               | <b>Tülu</b>                                           |
|--------------------------------|-------------------------------------------------------|
| <b>Base Models</b>             | Llama 3 base models                                   |
| <b>Position Embedding</b>      | Inherited from base model                             |
| <b>Normalization Type</b>      | Inherited from base model (LayerNorm)                 |
| <b>Normalization Position</b>  | Pre-layer                                             |
| <b>Instruction Datasets</b>    | Tulu3 Mixture(FLAN V2, OpenAssistant, WildChat GPT-4) |
| <b>Training Techniques</b>     | SFT, DPO, RLVR                                        |
| <b>Optimizer</b>               | AdamW                                                 |
| <b>Learning Rate Scheduler</b> | Linear decay with warmup                              |
| <b>Loss Function</b>           | Cross-Entropy                                         |

### A.2 Dataset Details

In this section, we provide an overview of the datasets used in our experiments.

**FineWeb:** The FineWeb dataset [Penedo et al., 2024] consists of more than 15T tokens of cleaned and deduplicated english text obtained from the web using CommonCrawl. While the full dataset contains 15T tokens, we use the smallest subset, i.e. a subsampled version of the dataset consisting of 10B tokens. The dataset is accessible on HuggingFace at <https://huggingface.co/datasets/HuggingFaceFW/fineweb>.

**WikiText:** The Wikitext dataset [Merity et al., 2016] is a collection of over 100 million tokens extracted from the set of verified Good and Featured articles on Wikipedia. We use only a subset of the dataset to perform early evaluations of RankMe and  $\alpha$ ReQ, before running our final experiments using FineWeb.

**SciQ:** The SciQ dataset [Welbl et al., 2017] contains over 13K crowdsourced science exam questions about physics, chemistry and biology, among many others. The questions are in multiple-choice format with 4 answer options each. The dataset is accessible on HuggingFace at <https://huggingface.co/datasets/allenai/sciq>.

**TriviaQA:** The TriviaQA dataset [Joshi et al., 2017] is a reading comprehension dataset containing over 650K question-answer-evidence triples. We use the TriviaQA dataset to evaluate a model’s ability to incorporate long-context information from the question in order to correctly answer it. The dataset is accessible on HuggingFace at [https://huggingface.co/datasets/mandarjoshi/trivia\\_qa](https://huggingface.co/datasets/mandarjoshi/trivia_qa).

**LAMBADA OpenAI:** This dataset [Radford et al., 2019] is comprised of the LAMBADA test split, pre-processed by OpenAI, and contains machine translated versions of the split in German, Spanish, French and Italian. We use this dataset to evaluate the model’s text understanding capabilities. The dataset is accessible on HuggingFace at [https://huggingface.co/datasets/EleutherAI/lambada\\_openai](https://huggingface.co/datasets/EleutherAI/lambada_openai).

**Anthropic Helpful-Harmless (HH):** The Anthropic-HH dataset provides human preference data about helpfulness and harmlessness, and is meant to be used for training preference models in a Reinforcement Learning with Human Feedback (RLHF) setting. However, we use a variant of

this dataset for SFT. Specifically, we generate a human-assistant chat dataset of  $\sim 161K$  samples by parsing the “chosen” responses for each instruction from the original dataset and using it to finetune a base model by treating the “chosen” response as the target (similar to Springer et al. [2025]). While such a use of this dataset is discouraged in practical settings, we use this modified dataset as a testbed for our SFT experiments. The original dataset is accessible on HuggingFace at <https://huggingface.co/datasets/Anthropic/hh-rlhf>.

**AlpacaFarm Human-ANN chat (AlpacaFarm):** This dataset is created by following a similar procedure as mentioned above for the Anthropic-HH dataset, but for the Human Evaluation dataset of the AlpacaFarm evaluation set [Dubois et al., 2023]. As a result, this dataset consists of  $\sim 17.7K$  samples, and is used as a positive control in our SFT experiments. Models that are finetuned on this dataset are expected to perform well on the AlpacaEval chat task (see below), compared to models that are finetuned on a different dataset. This positive control is essential to disentangle the in-distribution vs out-of-distribution abilities of a SFT-model. The original dataset is accessible on HuggingFace at [https://huggingface.co/datasets/tatsu-lab/alpaca\\_farm](https://huggingface.co/datasets/tatsu-lab/alpaca_farm).

**AlpacaEval:** AlpacaEval is an LLM-based automatic evaluation setup for comparing chat models in a fast, cheap and replicable setting. We use AlpacaEval as a test bench to study the behavior of models after undergoing SFT. Models that are finetuned on the AlpacaFarm dataset are expected to produce better chat models and generate responses more aligned to human-preferred responses to instructions in the AlpacaEval setup. We defer the reader to the corresponding github repository for further details of the evaluation setup.

**AMC23:** The AMC23 benchmark refers to a specific set of evaluations based on the American Mathematics Competitions. This benchmark is designed to assess the mathematical reasoning capabilities of advanced AI models using problems characteristic of the AMC series. For the evaluation of AMC23, we utilize the resources and methodologies found in the Qwen2.5-Math repository. This repository is accessible at <https://github.com/QwenLM/Qwen2.5-Math> and provides the framework for our assessment process.

### A.3 Compute and hyperparameter configuration details

**Compute resources:** All of our LLM inference experiments were run either on a single 80GB A100 or a 40GB L40S GPU. The finetuning experiments (SFT and DPO) were run on a single node consisting of 4 A100 GPUs.

| Hyperparameter      | Value               |
|---------------------|---------------------|
| Dataset             | FineWeb sample-10BT |
| Max sequence length | 512                 |
| Number of sequences | 15000               |
| Batch size          | 16                  |

Table 3: Hyperparameter configurations used for computing RankMe and  $\alpha$ ReQ in Figure 2.

### A.4 Reproducing Tulu-3-8B SFT and DPO

We follow instructions from [<https://github.com/allenai/open-instruct>] for reproducing and gathering the intermediate stage checkpoints (both for SFT and DPO) without changing any hyperparameters.

| Hyperparameter              | Value                                                      |
|-----------------------------|------------------------------------------------------------|
| SFT dataset                 | Anthropic-HH or AlpacaFarm<br>Human-ANN chat (train split) |
| Max sequence length         | 4096                                                       |
| Batch size                  | 16                                                         |
| Gradient accumulation steps | 16                                                         |
| Learning rate               | 1e-5                                                       |
| Learning rate schedule      | Linear decay with 10% warmup                               |
| Number of epochs            | 2                                                          |
| Loss reduction              | sum                                                        |
| Seeds                       | 0, 7, 8, 42, 420                                           |

Table 4: Hyperparameter configurations used for Supervised FineTuning (SFT).

| Hyperparameter              | Value                                   |
|-----------------------------|-----------------------------------------|
| Base model                  | OLMo2-1B                                |
| In-distribution dataset     | Anthropic-HH (test split)               |
| Out-of-distribution dataset | AlpacaFarm Human-ANN chat (train split) |
| Max sequence length         | 1024                                    |
| Number of sequences         | 10000                                   |
| Batch size                  | 32                                      |

Table 5: Hyperparameter configurations used for ID and OOD loss eval.

| Hyperparameter | Value                   |
|----------------|-------------------------|
| Base model     | OLMo2-1B                |
| Dataset        | AlpacaEval (test split) |
| Max new tokens | 1024                    |
| LM judge       | Cohere Command A        |

Table 6: Hyperparameter configurations used for chat winrate on AlpacaEval.

## B Gradient Descent and Cross-entropy theory

### B.1 Setup

Let  $s$  denote an individual instance (or input token sequence of language), with its true class identity (or the next token's index in vocabulary) given by  $y(s)$ . An (LLM) encoder, parameterized by  $\theta$ , processes  $s$  to produce its contextualized embedding,  $f_\theta(s) \in \mathbb{R}^d$ , where  $d$  is the embedding dimension. For a batch,  $S$ , of  $b$  such instances, the encoder outputs a matrix  $f_\theta(S) \in \mathbb{R}^{b \times d}$ . Subsequently, predictions  $\hat{\mathbf{y}} \in \mathbb{R}^{b \times |\mathcal{V}|}$  are generated by multiplying this batch embedding with a weight matrix  $W \in \mathbb{R}^{d \times |\mathcal{V}|}$ , where  $|\mathcal{V}|$  is the vocabulary size (or number of classes):

$$\hat{\mathbf{y}} = f_\theta(S)W$$

To simplify the setting such that it is analytically-tractable, we assume the embedding function  $f_\theta(s)$  to be modeled as a linear transformation of the input, i.e.  $f_\theta(s) = \theta^T s$ , where  $\theta \in \mathbb{R}^{d_{in} \times d}$  is a parameter matrix. For a batch, of  $b$  such instances, represented as a matrix  $S \in \mathbb{R}^{b \times d_{in}}$  whose row vectors are orthonormal (i.e.,  $SS^T = \mathbf{I}$ ). The batch embedding is, therefore,  $f_\theta(S) = S\theta \in \mathbb{R}^{b \times d}$ . Here,  $d_{in}$  is the input feature dimension and  $d$  is the embedding dimension.

**Note:** By imposing this i.i.d. assumption, we ensure that learning on one sample does not change the output of another sample, i.e. no inter-sample interference. While we admit that this assumption is unrealistic, and learning to predict the next token of one sequence in an autoregressive setup affects the output of another sequence, we believe that this assumption enables a first step towards understanding the implicit effect of cross-entropy loss optimization using gradient descent. We note that our results do not strictly depend on this assumption, and can be extended to non-i.i.d. samples. We leave this to future work.

**Note 2:** Note that our assumption of a linear embedding model,  $f_\theta$ , is also an aberration from the transformer-based LLMs. However, we focus on the effect of loss and optimization in this section and leave further investigation into the implicit bias of architecture to future studies.

### B.2 Linear approximation of Cross-entropy loss: Legendre Transform

Let us start by defining the cross-entropy loss for one example,  $s$ , which belongs to class  $c$  as:

$$\mathcal{L}_{CE}(s) = -\log \left( \frac{e^{\hat{y}_c}}{\sum_j e^{\hat{y}_j}} \right) = -\hat{y}_c + \log \left( \sum_j e^{\hat{y}_j} \right) \quad (6)$$

Note that eq. (6) is nonlinear in  $\hat{\mathbf{y}}$ , thereby making it harder to analyze the dynamical system in the parameter space that is imposed by gradient descent. In order to arrive at an analytical understanding of the gradient-induced dynamics when optimizing eq. (6), we will do a linear approximation of  $\mathcal{L}_{CE}$  using Legendre Transform, similar to Pezeshki et al. [2021]. Specifically, we will derive the Legendre transform of the nonlinear term,  $\log(\sum_j e^{\hat{y}_j})$ .

Intuitively, we want to approximate eq. (6) such that it changes linearly with changes in  $\hat{\mathbf{y}}$ . The key motivation for using Legendre transform is to ignore the second (and higher) order effects of a “small” change in  $\hat{\mathbf{y}}$  on  $\mathcal{L}_{CE}$ . Formally, we want the following:

$$\hat{\mathcal{L}}_{CE}(s) = -\hat{y}_c + \alpha^T \hat{\mathbf{y}} + g(\alpha) \quad (7)$$

where  $\alpha$  is the slope of the nonlinear term at  $\mathbf{x} = \hat{\mathbf{y}}$ .

$$\begin{aligned} \alpha &= \nabla_{\mathbf{x}} \log \left( \sum_j e^{x_j} \right) \Big|_{\mathbf{x}=\hat{\mathbf{y}}} \\ \implies \alpha_i &= \frac{\partial}{\partial x_i} \log \left( \sum_j e^{x_j} \right) \Big|_{x_j=\hat{y}_j} = \frac{e^{\hat{y}_i}}{\sum_j e^{\hat{y}_j}} \end{aligned} \quad (8)$$

Note that:  $\sum_i \alpha_i = 1$

To simplify things, let us denote  $C = \sum_j e^{\hat{y}_j}$ . Substituting this in eq. (8),  $\hat{y}_i = \log(\alpha_i) + \log(C)$ .

Now we need to find  $g(\alpha)$  such that  $f(\hat{\mathbf{y}}) = \alpha^T \hat{\mathbf{y}} + g(\alpha)$ .

$$\begin{aligned}
g(\alpha) &= f(\hat{\mathbf{y}}) - \alpha^T \hat{\mathbf{y}} = \log\left(\sum_j e^{\hat{y}_j}\right) - \alpha^T \hat{\mathbf{y}} = \log\left(\sum_j e^{\hat{y}_j}\right) - \sum_j \alpha_j \hat{y}_j \\
&= \log(C) - \sum_j \alpha_j \log(\alpha_j) - \sum_j \alpha_j \log(C) \\
&= \log(C) - \sum_j \alpha_j \log(\alpha_j) - \log(C) \quad [\text{Using } \sum_j \alpha_j = 1] \\
&= -\sum_j \alpha_j \log(\alpha_j) = H(\alpha)
\end{aligned} \tag{9}$$

where  $H(\alpha)$  denotes the Shannon entropy of a probability distribution defined by  $\alpha_i$ 's.

Substituting eq. (9) in eq. (7), we get the expression for the linearized cross-entropy loss:

$$\hat{\mathcal{L}}_{CE}(s) = -\hat{y}_c + \alpha^T \hat{\mathbf{y}} + H(\alpha) \tag{10}$$

### B.3 Gradient descent dynamics of linearized cross-entropy loss

$$\begin{aligned}
\hat{\mathcal{L}}_{CE}(s) &= -\hat{y}_c + \alpha^T \hat{\mathbf{y}} + H(\alpha) = -\hat{y}_c + \sum_j \alpha_j \hat{y}_j + H(\alpha) \\
&= -f_\theta(s)^T w_c + \sum_j \alpha_j f_\theta(s)^T w_j + H(\alpha) \\
\nabla_{f_\theta(s)} \hat{\mathcal{L}}_{CE}(s) &= -w_c + \sum_j \alpha_j w_j = \sum_j (\alpha_j - \delta_{j=c}) w_j \\
\nabla_{w_i} \hat{\mathcal{L}}_{CE}(s) &= -f_\theta(s) \delta_{i=c} + \alpha_i f_\theta(s) = (\alpha_i - \delta_{i=c}) f_\theta(s)
\end{aligned}$$

where  $\delta_{(\cdot)}$  is the Dirac-delta function, i.e. its value is 1 when the condition in subscript is true and 0 otherwise.

Denoting  $\tilde{\alpha}_i = (\alpha_i - \delta_{i=c})$ , we arrive at the gradient equations for  $f_\theta(s)$  and  $w_i$ 's:

$$\nabla_{f_\theta(s)} \hat{\mathcal{L}}_{CE}(s) = \sum_j \tilde{\alpha}_j w_j \quad , \quad \nabla_{w_i} \hat{\mathcal{L}}_{CE}(s) = \tilde{\alpha}_i f_\theta(s) \tag{11}$$

We can easily extend eq. (11) to multiple examples  $\{s_1, s_2 \dots s_b\}$  and write the gradient descent update (using learning rate  $\eta$ ) equations as:

$$\begin{aligned}
\dot{f}_\theta(s_j) &= -\eta \sum_i \tilde{\alpha}_i(s_j) w_i \quad , \quad \dot{w}_i = -\eta \sum_j \tilde{\alpha}_i(s_j) f_\theta(s_j) \\
\implies \dot{f}_\theta &= -\eta A W^T \quad , \quad \dot{W} = -\eta f_\theta^T A
\end{aligned} \tag{12}$$

where

$$A_{ij} = \begin{cases} \alpha_j(s_i) - 1 & \text{if } c_i = j \\ \alpha_j(s_i) & \text{else} \end{cases} \quad (i^{th} \text{ example, } s_i, \text{ belongs to the class } j)$$

### B.4 A useful matrix algebra result

**Lemma 1.** Let  $W(t)$  be a time-varying matrix with singular value decomposition (SVD):  $W(t) = U(t)S(t)V(t)^T$ , where  $U(t)$  and  $V(t)$  are orthogonal matrices corresponding to the left and right singular vectors, respectively, and  $S(t) = \text{diag}(\sigma_1(t), \sigma_2(t), \dots, \sigma_k(t))$  contains the singular values along its diagonal. Let  $u_k(t)$  and  $v_k(t)$  denote the  $k^{th}$  column vectors of  $U(t)$  and  $V(t)$ , respectively. Then the time derivative of the  $k^{th}$  singular value,  $\sigma_k(t)$ , is given by:

$$\dot{\sigma}_k(t) = u_k(t)^T \dot{W}(t) v_k(t)$$

*Proof.* For sake of brevity, we will drop the explicit time-dependence of each matrix from the notations. Let us write the singular vector decomposition (SVD) of matrix,  $W = USV^T$ . Using the product rule of differentiation:

$$\begin{aligned}
\dot{W} &= \dot{U}SV^T + U\dot{S}V^T + US\dot{V}^T \\
\implies U^T\dot{W}V &= U^T\dot{U}S + \dot{S} + S\dot{V}^TV \\
\implies \dot{S} &= U^T\dot{W}V - U^T\dot{U}S - S\dot{V}^TV \\
\implies \dot{\sigma}_k &= u_k^T\dot{W}v_k - u_k^T\dot{u}_k\sigma_k - \sigma_k\dot{v}_k^Tv_k
\end{aligned} \tag{13}$$

where the last line is the expression for the  $k^{th}$  diagonal element of  $S$ . By definition of orthonormal vectors,  $u_k^Tu_k = 1$ . So,  $\dot{u}_k^Tu_k + u_k^T\dot{u}_k = 0$ . Since  $u_k^Tu_k$  is a scalar,  $\dot{u}_k^Tu_k = u_k^T\dot{u}_k$ . Therefore,  $\dot{u}_k^Tu_k = 0$ . Similarly,  $\dot{v}_k^Tv_k = 0$ . Therefore,

$$\dot{\sigma}_k = u_k^T\dot{W}v_k$$

□

## B.5 Formal versions of theoretical results and proofs

**Theorem 1.** Let  $f_\theta = U_1S_1V_1^T$  and  $W = U_2S_2V_2^T$  denote the respective singular value decompositions (SVDs) of non-degenerate matrices  $f_\theta$  and  $W$ , respectively. If the system is initialized such that  $f_\theta^T f_\theta = WW^T$ , then it holds that:

$$V_1 = U_2 \quad , \quad S_1^2 = S_2^2$$

*Proof.* Let us start from the learning dynamics imposed by gradient-descent:

$$\dot{f}_\theta = -\eta AW^T \quad , \quad \dot{W} = -\eta f_\theta^T A \tag{14}$$

Let us write  $f_\theta$  and  $W$  as their respective singular value decomposed form, i.e. say  $f_\theta = U_1S_1V_1^T$  and  $W = U_2S_2V_2^T$ . Consider the dynamics of  $f_\theta^T f_\theta$  and  $WW^T$ :

$$\begin{aligned}
\frac{d}{dt}(f_\theta^T f_\theta) &= \dot{f}_\theta^T f_\theta + f_\theta^T \dot{f}_\theta = (-\eta AW^T)^T f_\theta + f_\theta^T (-\eta AW^T) \\
&= -\eta W A^T f_\theta - \eta f_\theta^T A W^T
\end{aligned} \tag{15}$$

$$\begin{aligned}
\frac{d}{dt}(WW^T) &= \dot{W}W^T + W\dot{W}^T = (-\eta f_\theta^T A)W^T + W(-\eta f_\theta^T A)^T \\
&= -\eta f_\theta^T A W^T - \eta W A^T f_\theta
\end{aligned} \tag{16}$$

From eqs. (15) and (16), it is clear that  $\frac{d}{dt}(f_\theta^T f_\theta) = \frac{d}{dt}(WW^T)$ , i.e.  $f_\theta^T f_\theta = WW^T + C$ , for some constant  $C$ . If we assume the initialization to be such that  $C = 0$  and  $f_\theta$  and  $W$  are non-degenerate, we have:

$$f_\theta^T f_\theta = WW^T \implies V_1S_1^2V_1^T = U_2S_2^2U_2^T$$

By uniqueness of SVD (for positive semi-definite matrices):

$$\begin{aligned}
V_1 = U_2 &\implies V_1^T U_2 = I \\
S_1^2 &= S_2^2
\end{aligned}$$

□

**Theorem 2.** Let  $f_\theta, W$  be the matrices whose dynamics are governed by the gradient-descent equations as previously defined. Given the conditions from Theorem 1, the magnitude of the time derivatives of the  $i^{th}$  singular values of  $f_\theta$  and  $W$  are proportional to their respective singular values:

$$\begin{aligned}
\|\dot{\sigma}_{1i}\| &\propto \sigma_{1i} \\
\|\dot{\sigma}_{2i}\| &\propto \sigma_{2i}
\end{aligned}$$



Furthermore, assuming uniform class prediction at initialization and that number of classes,  $|\mathcal{V}| \gg 1$ , the time derivatives are bounded by the dominant class size:

$$\|\dot{\sigma}_{1i}\|, \|\dot{\sigma}_{2i}\| \propto \mathcal{O}(\mathcal{N}(c^{(0)}))$$

where  $\mathcal{N}(c^{(0)})$  denotes the number of instances belonging to the dominant class  $c^{(0)}$ .

*Proof.* Let us start from the results of Theorem 1:  $S_1^2 = S_2^2 \implies \sigma_{1i}^2 = \sigma_{2i}^2 \forall i$ . So,  $\sigma_{1i} = \pm \sigma_{2i}$ . Using this relation, we can simplify the expression of  $\sigma_{1i}$  dynamics. From Lemma 1,

$$\begin{aligned} \dot{\sigma}_{1i} &= u_{1i}^T \dot{f}_\theta v_{1i} = -\eta u_{1i}^T A W^T v_{1i} \\ &= -\eta u_{1i}^T A (U_2 S_2 V_2^T)^T v_{1i} = -\eta u_{1i}^T A V_2 S_2 U_2^T v_{1i} \\ &= -\eta u_{1i}^T A V_2 S_2 V_1^T v_{1i} \quad [\text{Using Theorem 1}] \\ &= -\eta \sum_j (u_{1i}^T A v_{2j}) \sigma_{2j} (v_{1j} v_{1i}) = -\eta \sum_j (u_{1i}^T A v_{2j}) \sigma_{2j} \delta_{i=j} \\ \implies \dot{\sigma}_{1i} &= -\eta (u_{1i}^T A v_{2i}) \sigma_{2i} \end{aligned} \tag{17}$$

Similarly, we can simplify the dynamics for  $\sigma_{2i}$ :

$$\dot{\sigma}_{2i} = -\eta (u_{1i}^T A v_{2i}) \sigma_{1i} \tag{18}$$

For sake of brevity, let us denote  $(u_{1i}^T A v_{2i}) = g_i$ . Using the relationship between  $\sigma_{1i}$  and  $\sigma_{2i}$ , we can simplify eqs. (17) and (18) as:

$$\dot{\sigma}_{1i} = -\eta g_i (\pm \sigma_{1i}) = \mp \eta g_i \sigma_{1i} \quad , \quad \dot{\sigma}_{2i} = -\eta g_i (\pm \sigma_{2i}) = \mp \eta g_i \sigma_{2i} \tag{19}$$

$$\implies \|\dot{\sigma}_{1i}\| \propto \sigma_{1i} \quad , \quad \|\dot{\sigma}_{2i}\| \propto \sigma_{2i} \tag{20}$$

Also, note that  $g_i = u_{1i}^T A v_{2i} = \sum_{j,k} u_{1ij} A_{jk} v_{2ik}$ , where  $A_{jk} = \{\alpha_k(s_j) - 1, \alpha_k(s_j)\}$ . Therefore,  $A_{jk} \in (-1, 1)$ .

At initialization, WLOG  $\alpha_k(s_j) \approx \frac{1}{|\mathcal{V}|} \forall j, k$ , i.e. uniform class prediction. Additionally, assuming  $|\mathcal{V}| \gg 1$ , we can estimate  $g_i$  as the following:

$$\begin{aligned} g_i &= \sum_{j,k} u_{1ij} A_{jk} v_{2ik} = \sum_k \left( \sum_{j \in \{c_j=k\}} u_{1ij} (\alpha_k(s_j) - 1) v_{2ik} + \sum_{j \in \{c_j \neq k\}} u_{1ij} \alpha_k(s_j) v_{2ik} \right) \\ \implies g_i &\approx \sum_k \left( \left( \frac{1}{|\mathcal{V}|} - 1 \right) \sum_{j \in \{c_j=k\}} u_{1ij} v_{2ik} + \frac{1}{|\mathcal{V}|} \sum_{j \in \{c_j \neq k\}} u_{1ij} v_{2ik} \right) \\ &\approx - \left( \sum_k v_{2ik} \right) \left( \sum_{j \in \{c_j=k\}} u_{1ij} \right) = \mathcal{O}(\mathcal{N}(c^{(0)})) \end{aligned} \tag{21}$$

where  $c^{(0)}$  denotes the dominant class, i.e. the class with most number of instances. Combining eq. (21) with eq. (19), we get the desired result:

$$\|\dot{\sigma}_{1i}\|, \|\dot{\sigma}_{2i}\| \propto \mathcal{O}(\mathcal{N}(c^{(0)})) \tag{22}$$

□

## C Additional Experimental results

### C.1 Generative behavior of LLMs: Qualitative inspection

[illegible]

Figure 6: Evidence of echolalia: Generated text from early checkpoints (step-1000) of OLMo-2-7B models, compared to that from later stages of pretraining (step-920000).

## C.2 Examining Context Statistics and the Necessity of Full-Spectrum Information

| Suffix Length | Frequency (%) |
|---------------|---------------|
| $\leq 3$      | 25.41         |
| 4             | 46.61         |
| 5             | 16.71         |
| 6             | 6.08          |
| 7             | 2.40          |
| 8             | 1.46          |
| $> 8$         | 1.34          |

Table 7:  $\infty$ -gram context in TriviaQA. Suffix lengths reveal focus on short- to mid-context statistics.

| Model       | Original | Top-10  |          | Top-50  |          |
|-------------|----------|---------|----------|---------|----------|
|             |          | Removed | Retained | Removed | Retained |
| Pythia-1B   | 0.838    | 0.849   | 0.225    | 0.835   | 0.318    |
| Pythia-1.4B | 0.866    | 0.855   | 0.232    | 0.859   | 0.324    |
| Pythia-2.8B | 0.884    | 0.880   | 0.219    | 0.873   | 0.317    |
| Pythia-6.9B | 0.896    | 0.893   | 0.202    | 0.906   | 0.327    |
| OLMo-2-1B   | 0.953    | 0.943   | 0.199    | 0.954   | 0.326    |
| OLMo-2-7B   | 0.970    | 0.966   | 0.155    | 0.970   | 0.308    |

Table 8: **Full-spectrum information is required.** Retaining only top eigen-directions markedly degrades SciQ accuracy.

### C.3 Computing spectral metrics, RankMe and $\alpha$ ReQ

| Model       | $\alpha$ ReQ (p-value) | RankMe (p-value)  |
|-------------|------------------------|-------------------|
| Pythia-1B   | 0.810 (1.50e-5)        | -0.759 (1.04e-4)  |
| Pythia-1.4B | 0.668 (1.29e-3)        | -0.713 (4.18e-4)  |
| Pythia-2.8B | 0.694 (6.88e-4)        | -0.635 (2.63e-3)  |
| Pythia-6.9B | 0.837 (4.20e-6)        | -0.885 (2.19e-7)  |
| Pythia-12B  | 0.836 (4.42e-6)        | -0.839 (3.79e-6)  |
| OLMo2-1B    | 0.540 (4.920e-7)       | -0.616 (3.201e-9) |

Table 9: **SciQ accuracy correlates with spectral geometry.** Positive correlation with  $\alpha$ ReQ (compactness) and negative correlation with RankMe (effective dimensionality) across Pythia (1–12B) and OLMo2-1B models. The p-values in parentheses indicate high statistical significance for all correlations.

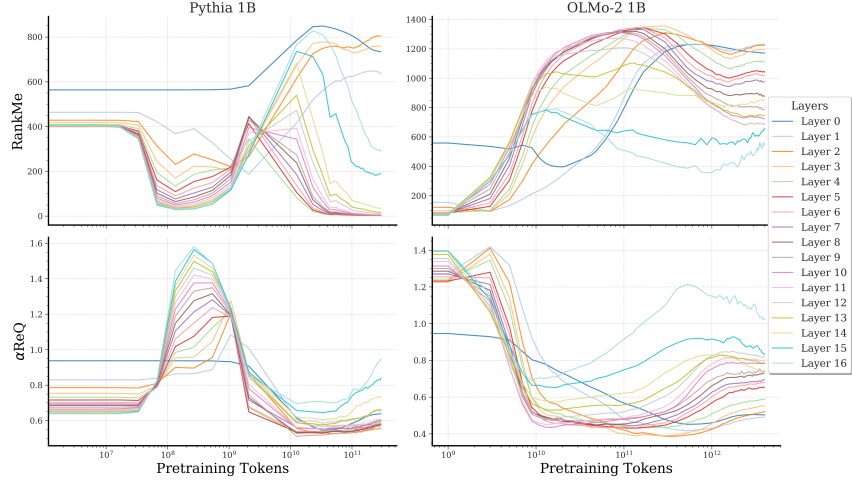

Figure 7: **Layerwise evolution mirrors the three phases.** Spectral metrics (RankMe and  $\alpha\text{ReQ}$ ) computed across intermediate layers during pretraining show that the three-phase pattern is consistent across network depth, justifying the use of last-layer representations for tracking global geometric dynamics. See Appendix for additional robustness analyses across samples, sequence lengths, and datasets.

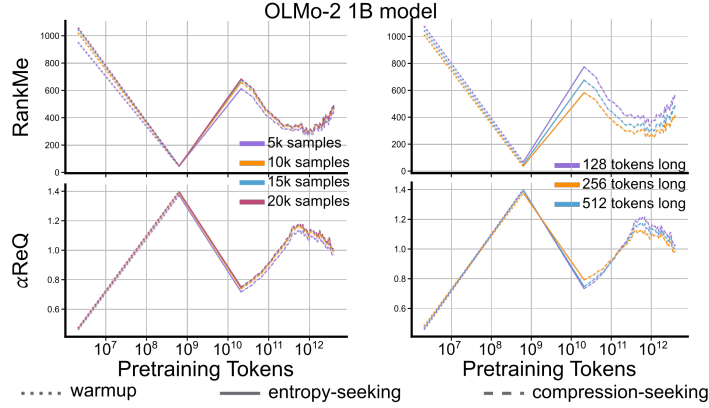

Figure 8: RankMe and  $\alpha\text{ReQ}$  computed for intermediate checkpoints of the OLMo-2-1B model using **(Left)** different number of samples, and **(Right)** sequence length. Shaded error bars indicate standard error about mean.

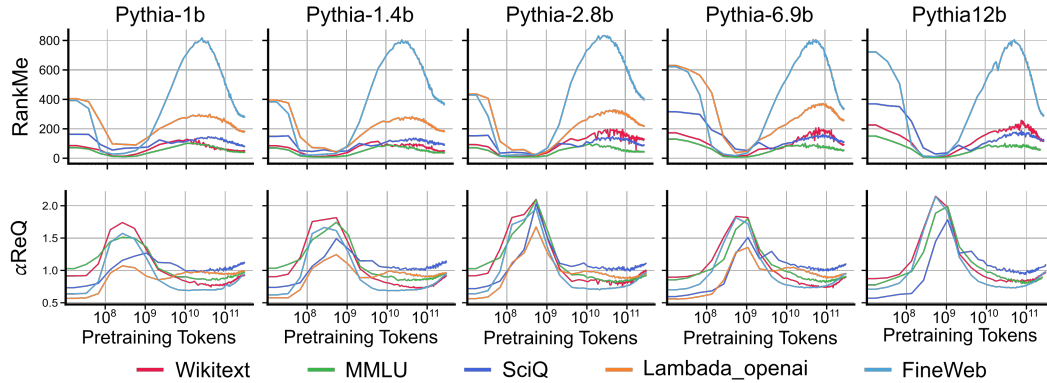

Figure 9: RankMe and  $\alpha\text{ReQ}$  computed for intermediate checkpoints of models from the Pythia family on different datasets.

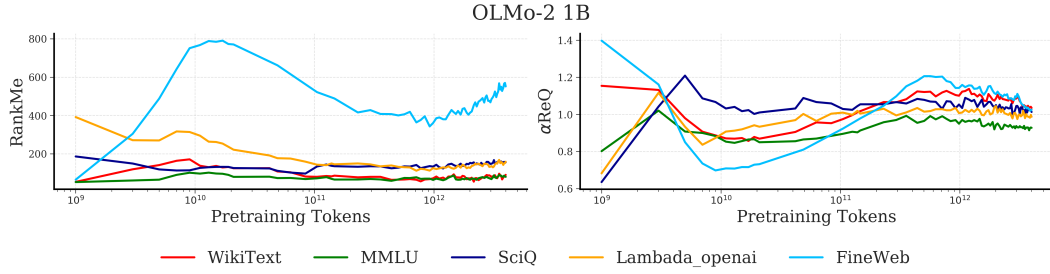

Figure 10: **OLMo spectral metrics are robust across datasets.** RankMe and  $\alpha$ ReQ computed for intermediate checkpoints of OLMo-2 1B model on different datasets, showing consistent phase patterns across evaluation data.

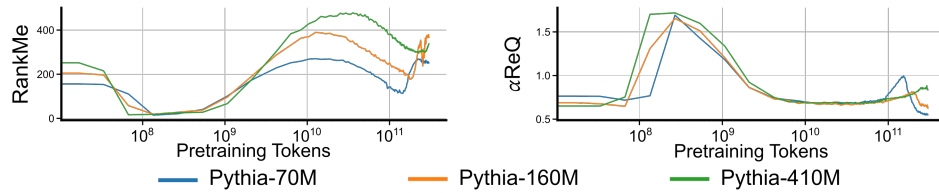

Figure 11: RankMe and  $\alpha$ ReQ computed for intermediate checkpoints of smaller models (< 1B) from the Pythia family on the FineWeb dataset.

#### C.4 Control experiments verifying the necessity condition for multiphase learning dynamics

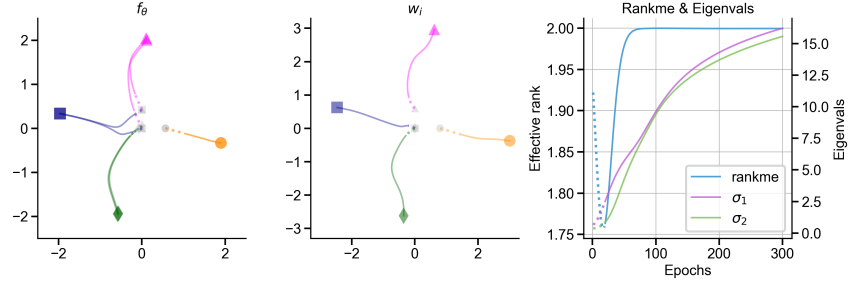

(a) Feature and weight dynamics in analytically-tractable model with uniform class distribution, i.e. each class has equal number of samples. Here, each class has 2 samples each.

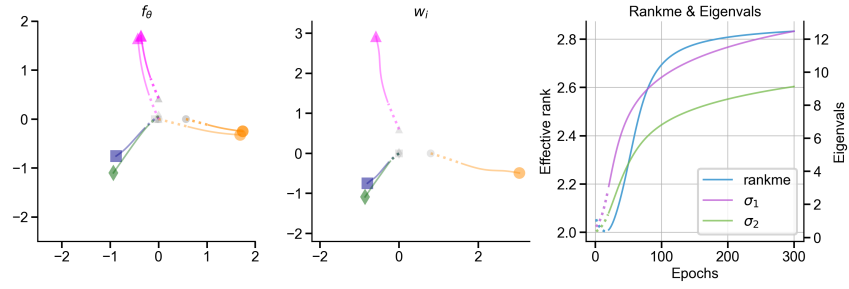

(b) Feature and weight dynamics in analytically-tractable model with no information bottleneck, i.e. feature dimensionality,  $d$ , is comparable to number of classes,  $|\mathcal{V}|$ . Here,  $d = 3$  and  $|\mathcal{V}| = 4$ . Note that we only plot the first two dimensions for ease and consistency of visualization.

Figure 12: Negative control experiments analogous to Figure 4. Removing either the skewed class distribution or the information bottleneck gets rid of the three distinct phases of learning. In each case, the resulting dynamics is an initial “warmup”, followed by an “entropy-seeking” phase wherein effective rank continues to grow monotonically.



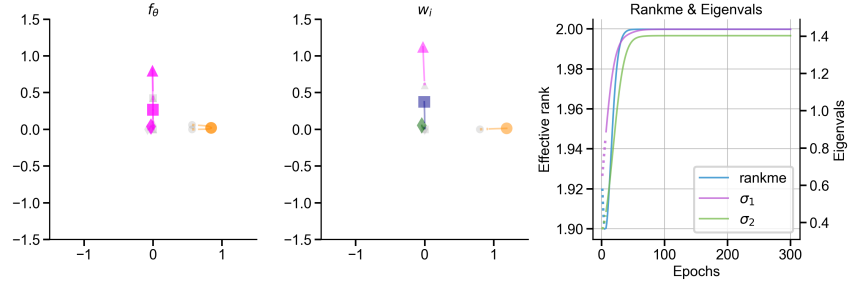

(a) Feature and weight dynamics in analytically-tractable model trained using MSE loss on a uniform class distribution, i.e. each class has equal number of samples. Here, each class has 2 samples each.

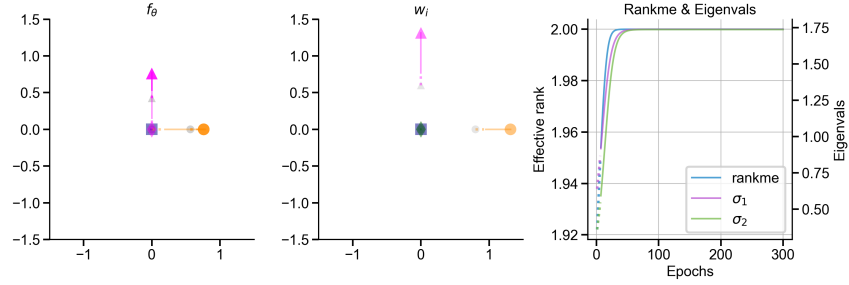

(b) Feature and weight dynamics in analytically-tractable model trained using MSE loss on a skewed class distribution. Note that only information about the most frequently occurring classes are learned.

Figure 13: Negative control experiments analogous to Figure 4, with mean squared error instead of cross-entropy as the training loss. In both uniform and skewed label distribution settings, the resulting dynamics is an initial “warmup”, followed by an “entropy-seeking” phase wherein effective rank grows monotonically and quickly saturates.

## C.5 Supervised finetuning

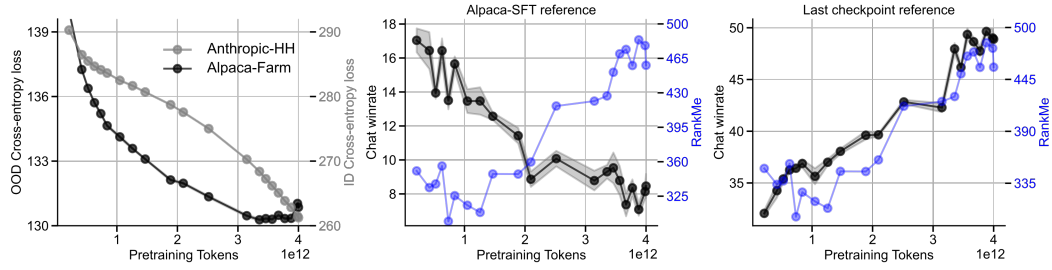

Figure 14: Loss and chat win rates after SFT on Anthropic-HH dataset. **(Left)** Cross-entropy loss on in-distribution (Anthropic-HH) test set and out-of-distribution (Alpaca-Farm-human-ANN chat) dataset. While in-distribution loss after SFT decreases monotonically, ood loss after SFT saturates or gets slightly worse with longer pretraining. **(Center)** Length-controlled chat win rates for Anthropic-SFT vs Alpaca-SFT version of a base model on AlpacaEval. Longer pretraining increases the sensitivity of the model’s behavior to the SFT dataset. **(Right)** Length-controlled win rates for Anthropic-SFT version of intermediate base models compared to the Anthropic-SFT version of the final base model checkpoint. Models obtained from later in pretraining are equivalent chat models, demonstrating nearly 50% win rate compared to the final checkpoint. Choosing the ideal checkpoint to use for SFT requires navigating the tradeoff between an improvement in base model’s capability (note an increased RankMe) and reduction in robustness with longer pretraining. Shaded bars indicate standard deviation computed over 5 seeds.
